# Supplementary material for: α-N-Linked glycopeptides: conformational analysis and bioactivity as lectin ligands
Source: Royal Society of Chemistry journal article supplement (doi:10.1039/c2ob07135e), 2012-01-01

## SUPPORTING INFORMATION

### $\alpha$ -N-LINKED GLYCOPEPTIDES: CONFORMATIONAL ANALYSIS AND BIOACTIVITY AS LECTIN LIGANDS

Filipa Marcelo,<sup>a,d</sup> F. Javier Cañada,<sup>a</sup> Jesús Jiménez-Barbero<sup>a</sup>

*<sup>a</sup>Chemical and Physical Biology, Centro de Investigaciones Biológicas, Consejo Superior de  
Investigaciones Científicas, Ramiro de Maeztu 9, 28040, Madrid, Spain*

*<sup>d</sup>REQUIMTE, CQFB, Departamento de Química, Faculdade de Ciências e Tecnologia, UNL, 2829-  
516 Caparica, Portugal*

Cinzia Colombo,<sup>b</sup> Fabio Doro,<sup>b</sup> Anna Bernardi<sup>b</sup>

*<sup>b</sup>Universita' degli Studi di Milano, Dipartimento di Chimica Organica e Industriale, via Venezian  
21, 20133 Milano, Italy*

Sabine André,<sup>c</sup> Hans-Joachim Gabius<sup>c</sup>

*<sup>c</sup>Institute of Physiological Chemistry, Faculty of Veterinary Medicine, Ludwig-Maximilians-  
University Munich, Veterinärstr. 13, 80539, Munich, Germany*

## Table of contents

|                                                         | <b>pages</b> |
|---------------------------------------------------------|--------------|
| $^1\text{H}$ - $^{13}\text{C}$ spectra of new compounds | S3 – S10     |
| NMR data for conformational analysis in the free state  | S11 – S15    |
| NMR binding studies                                     | S16 – S20    |
| 3D structures obtained by Docking studies               | S21 – S23    |

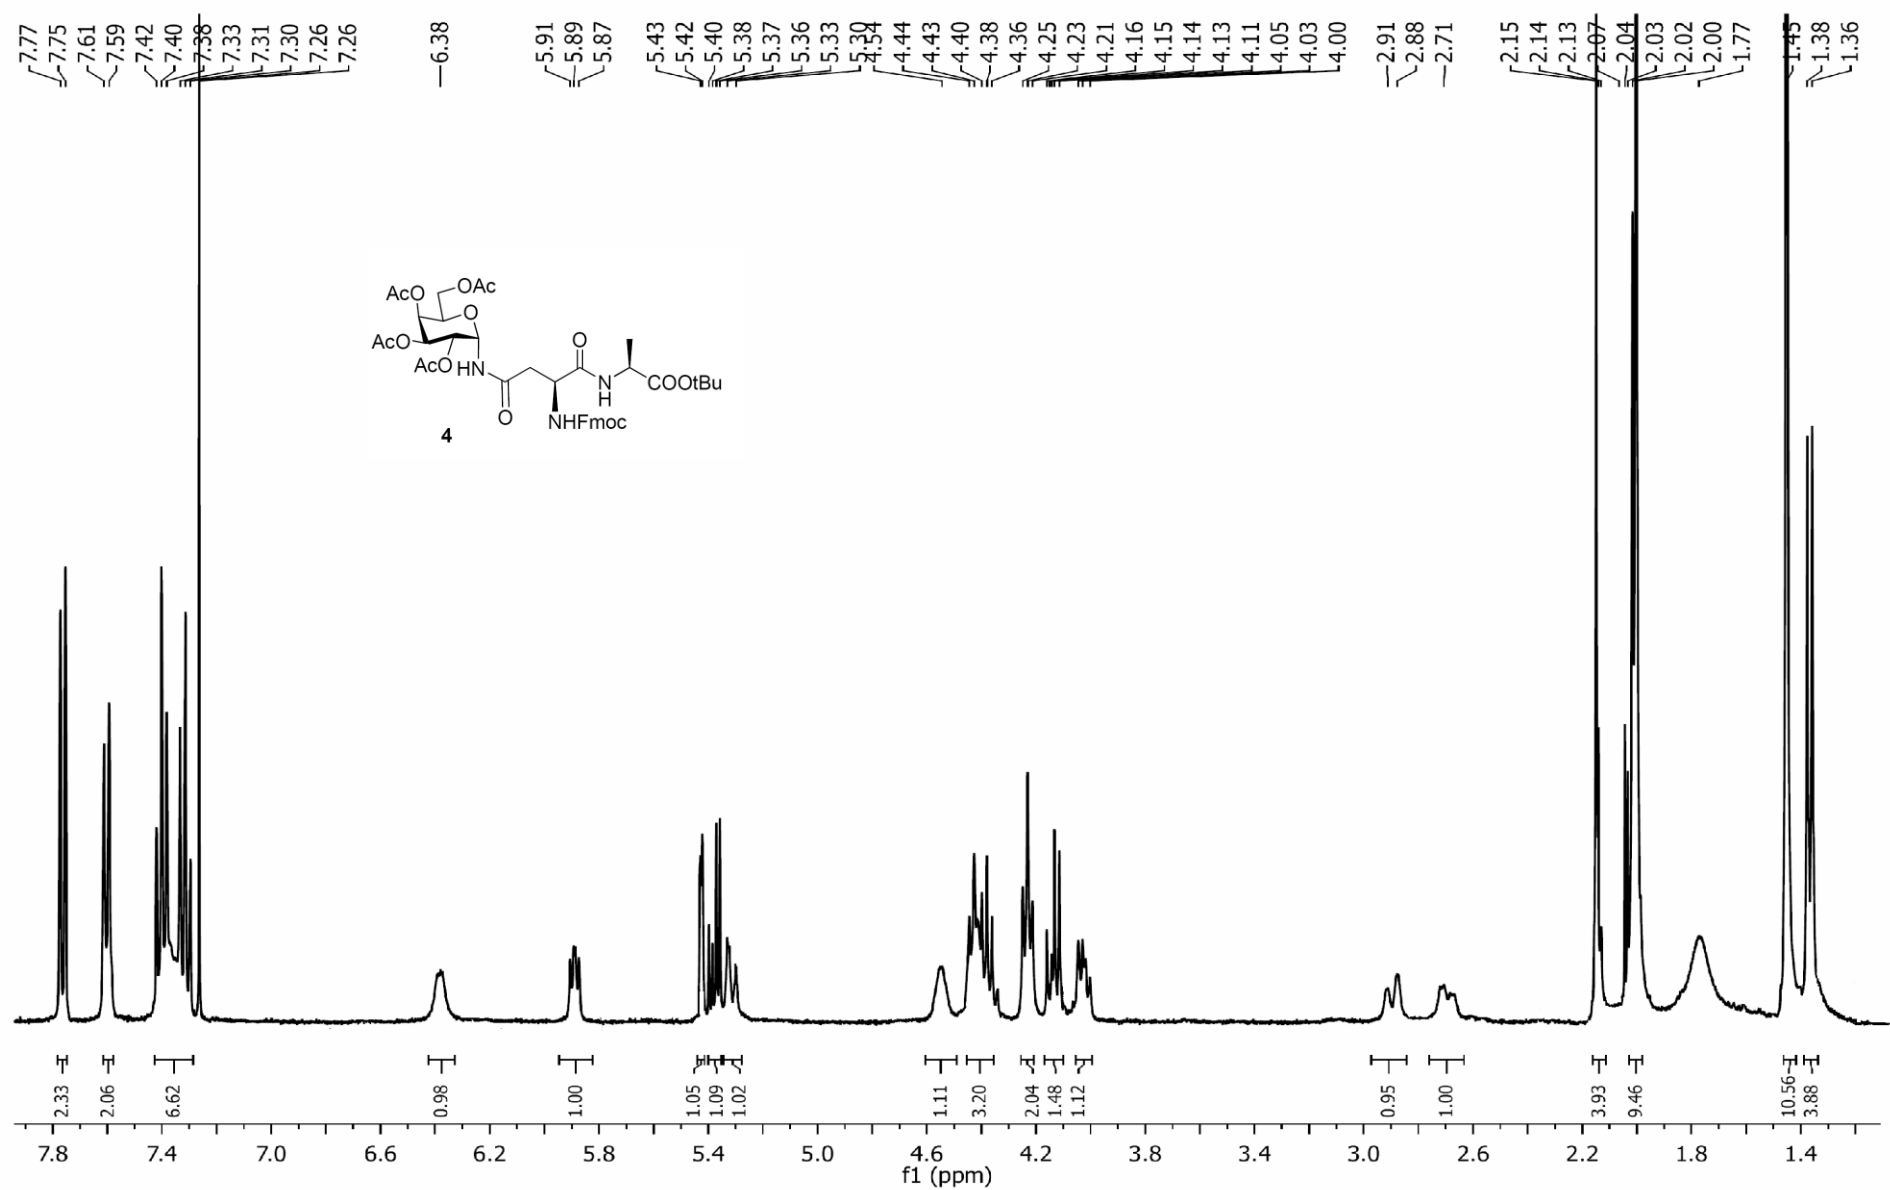

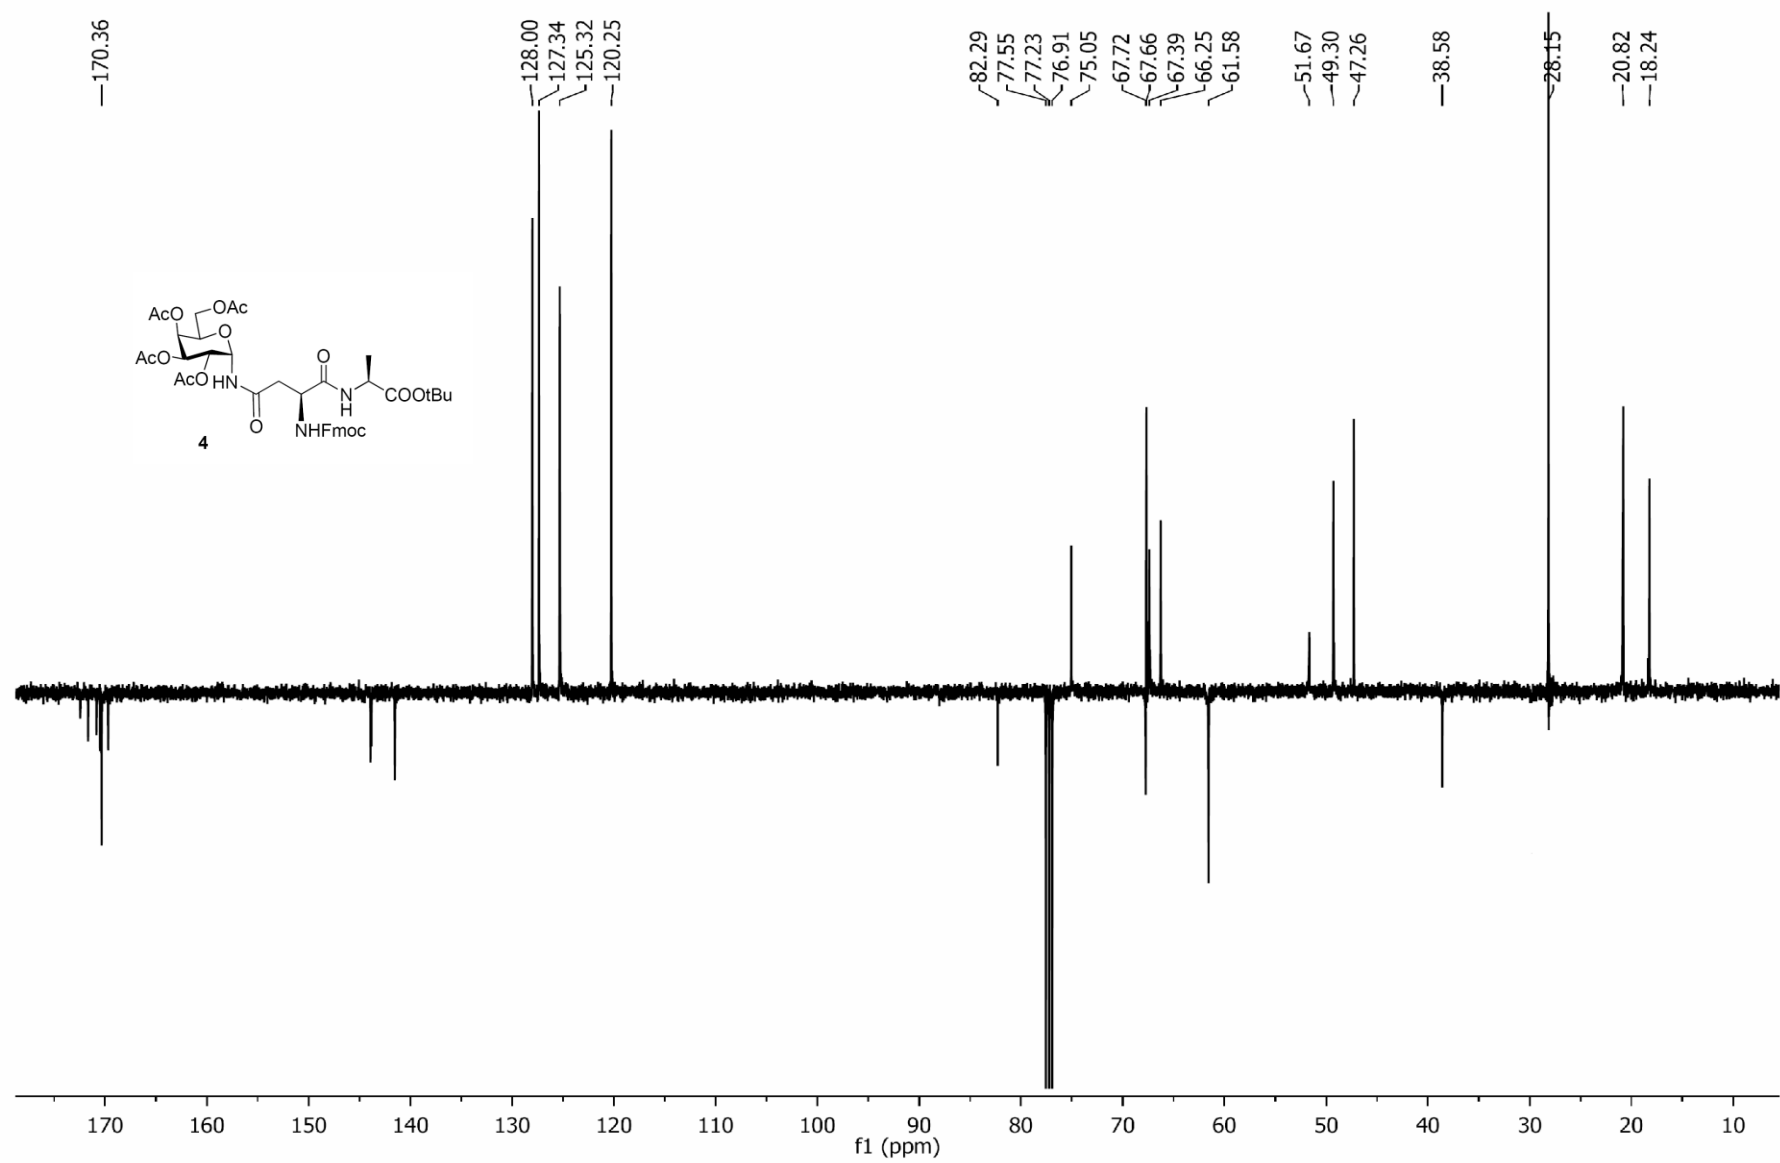

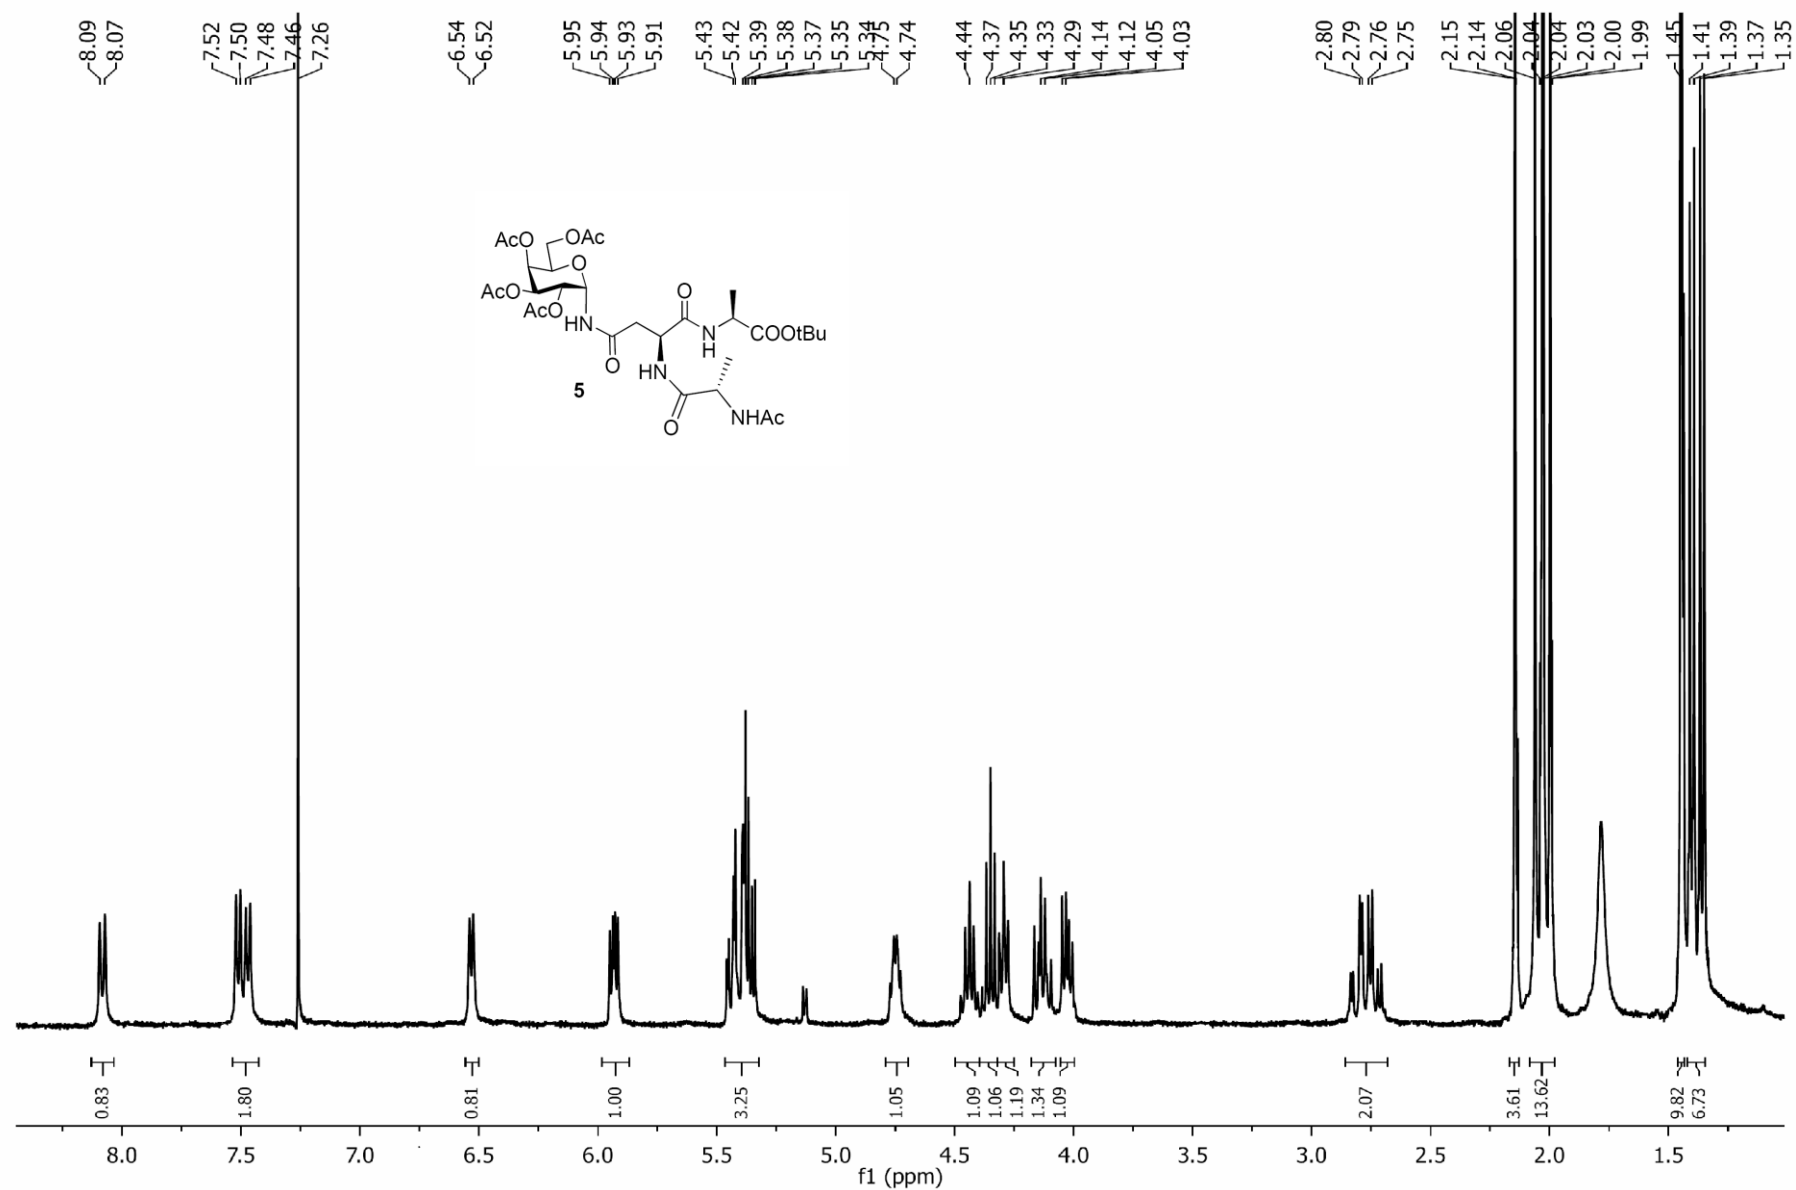

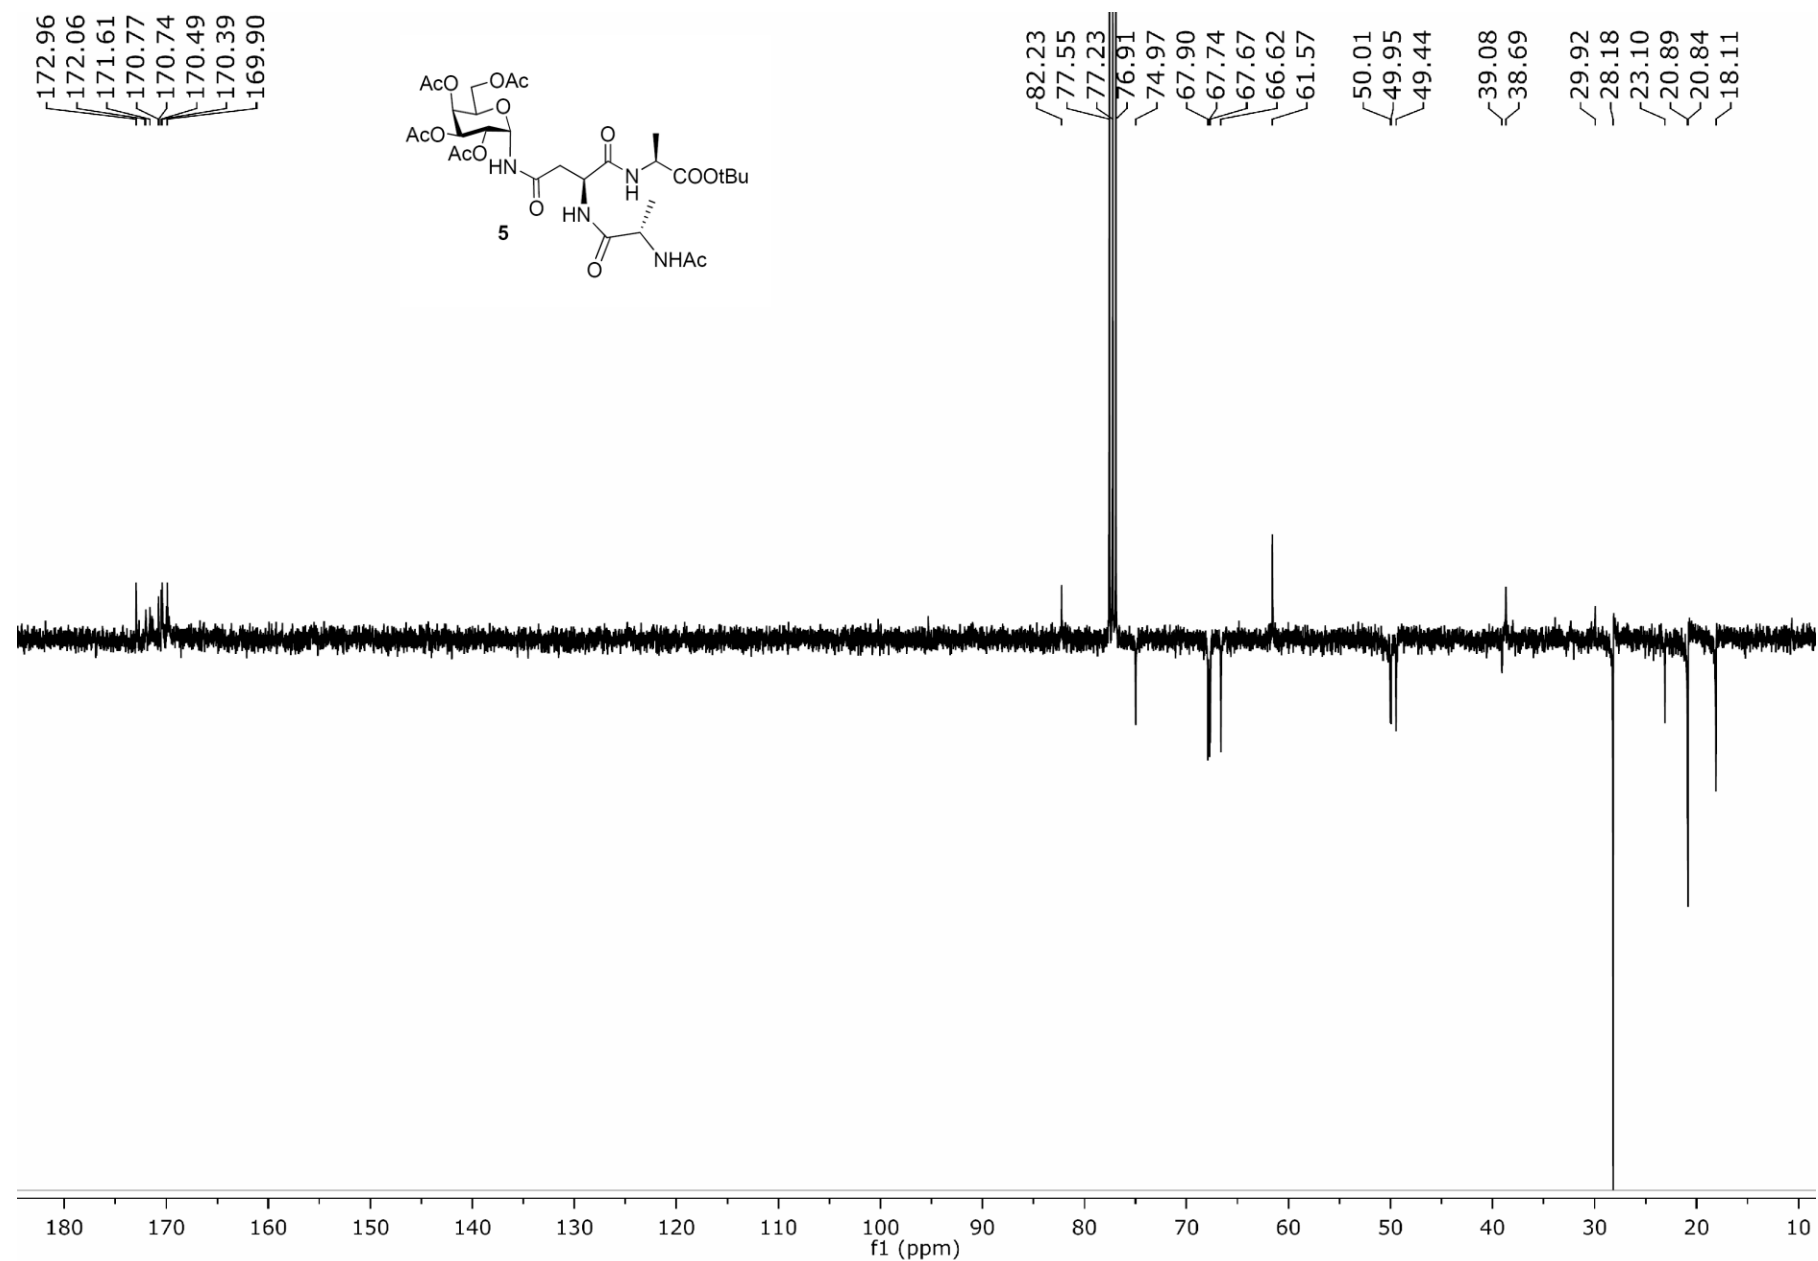

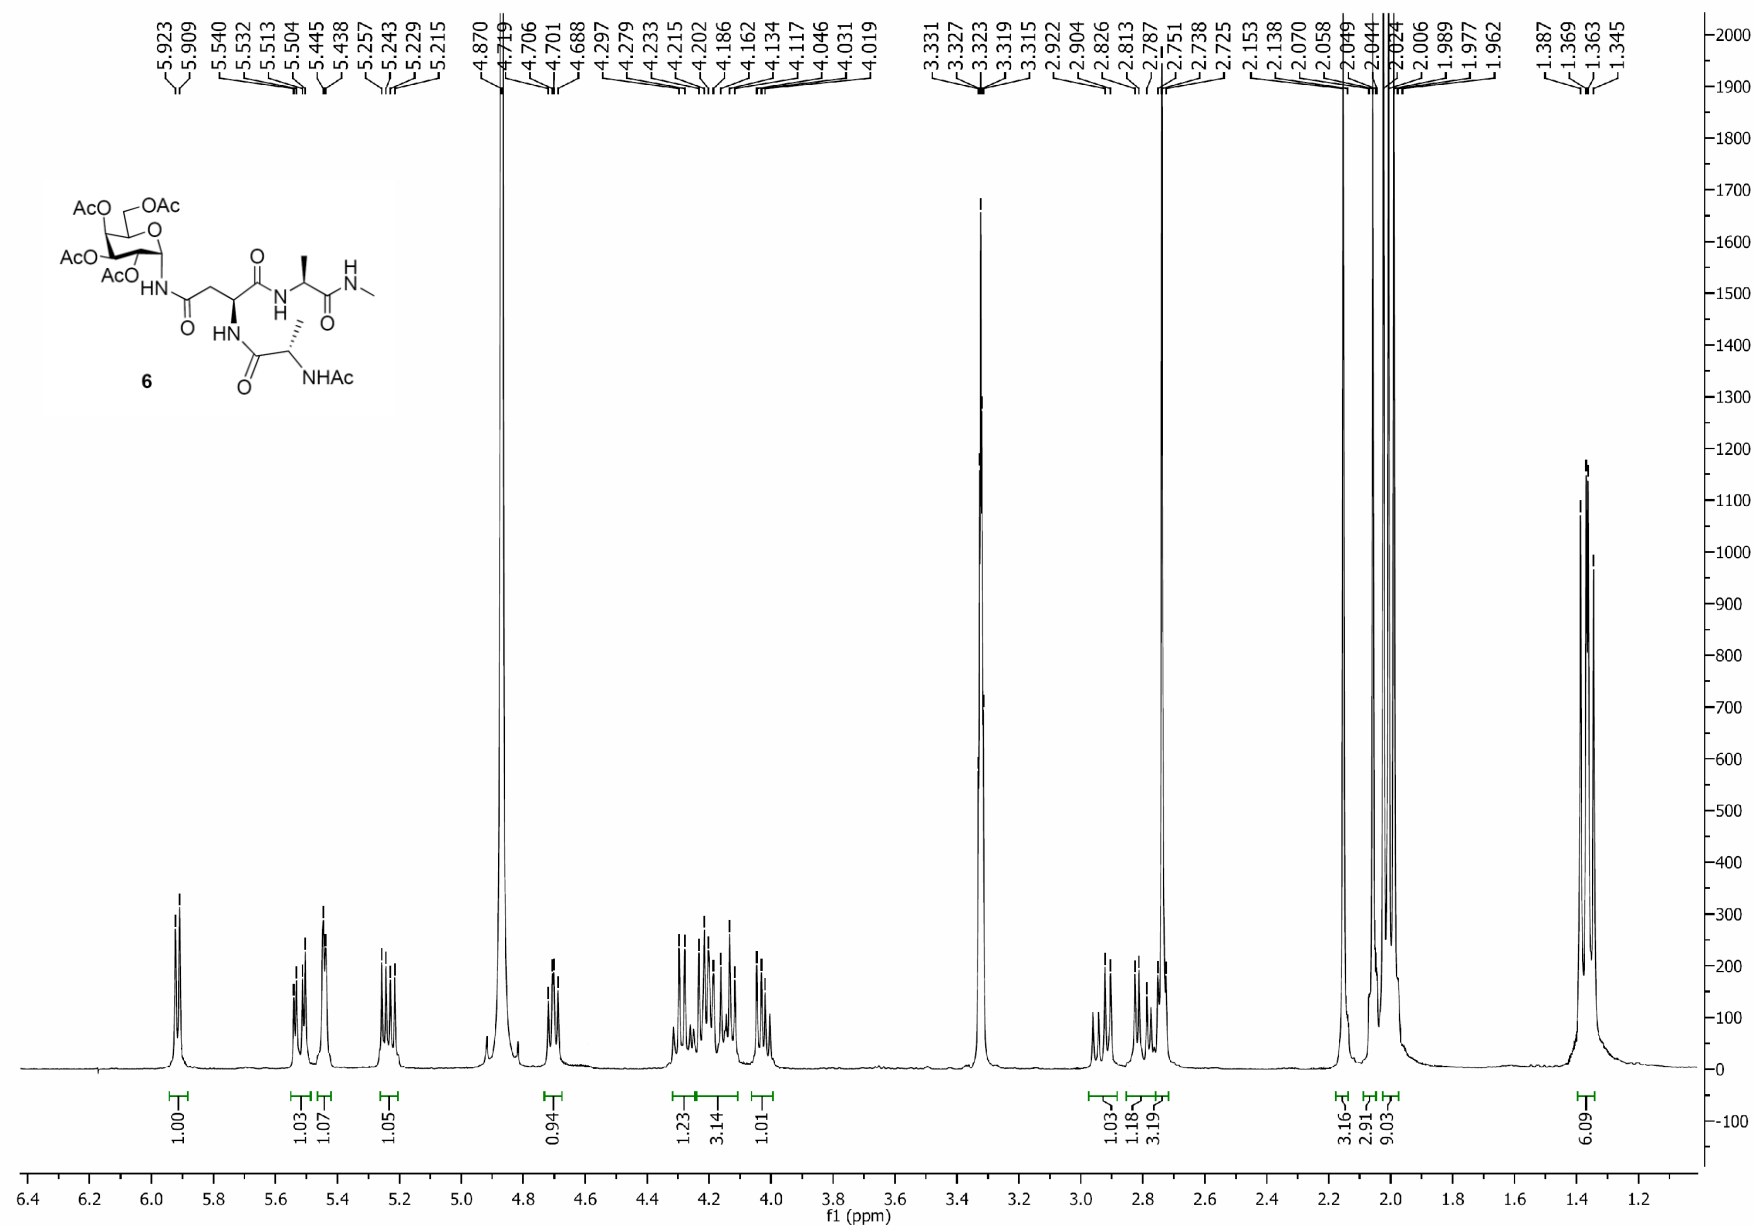

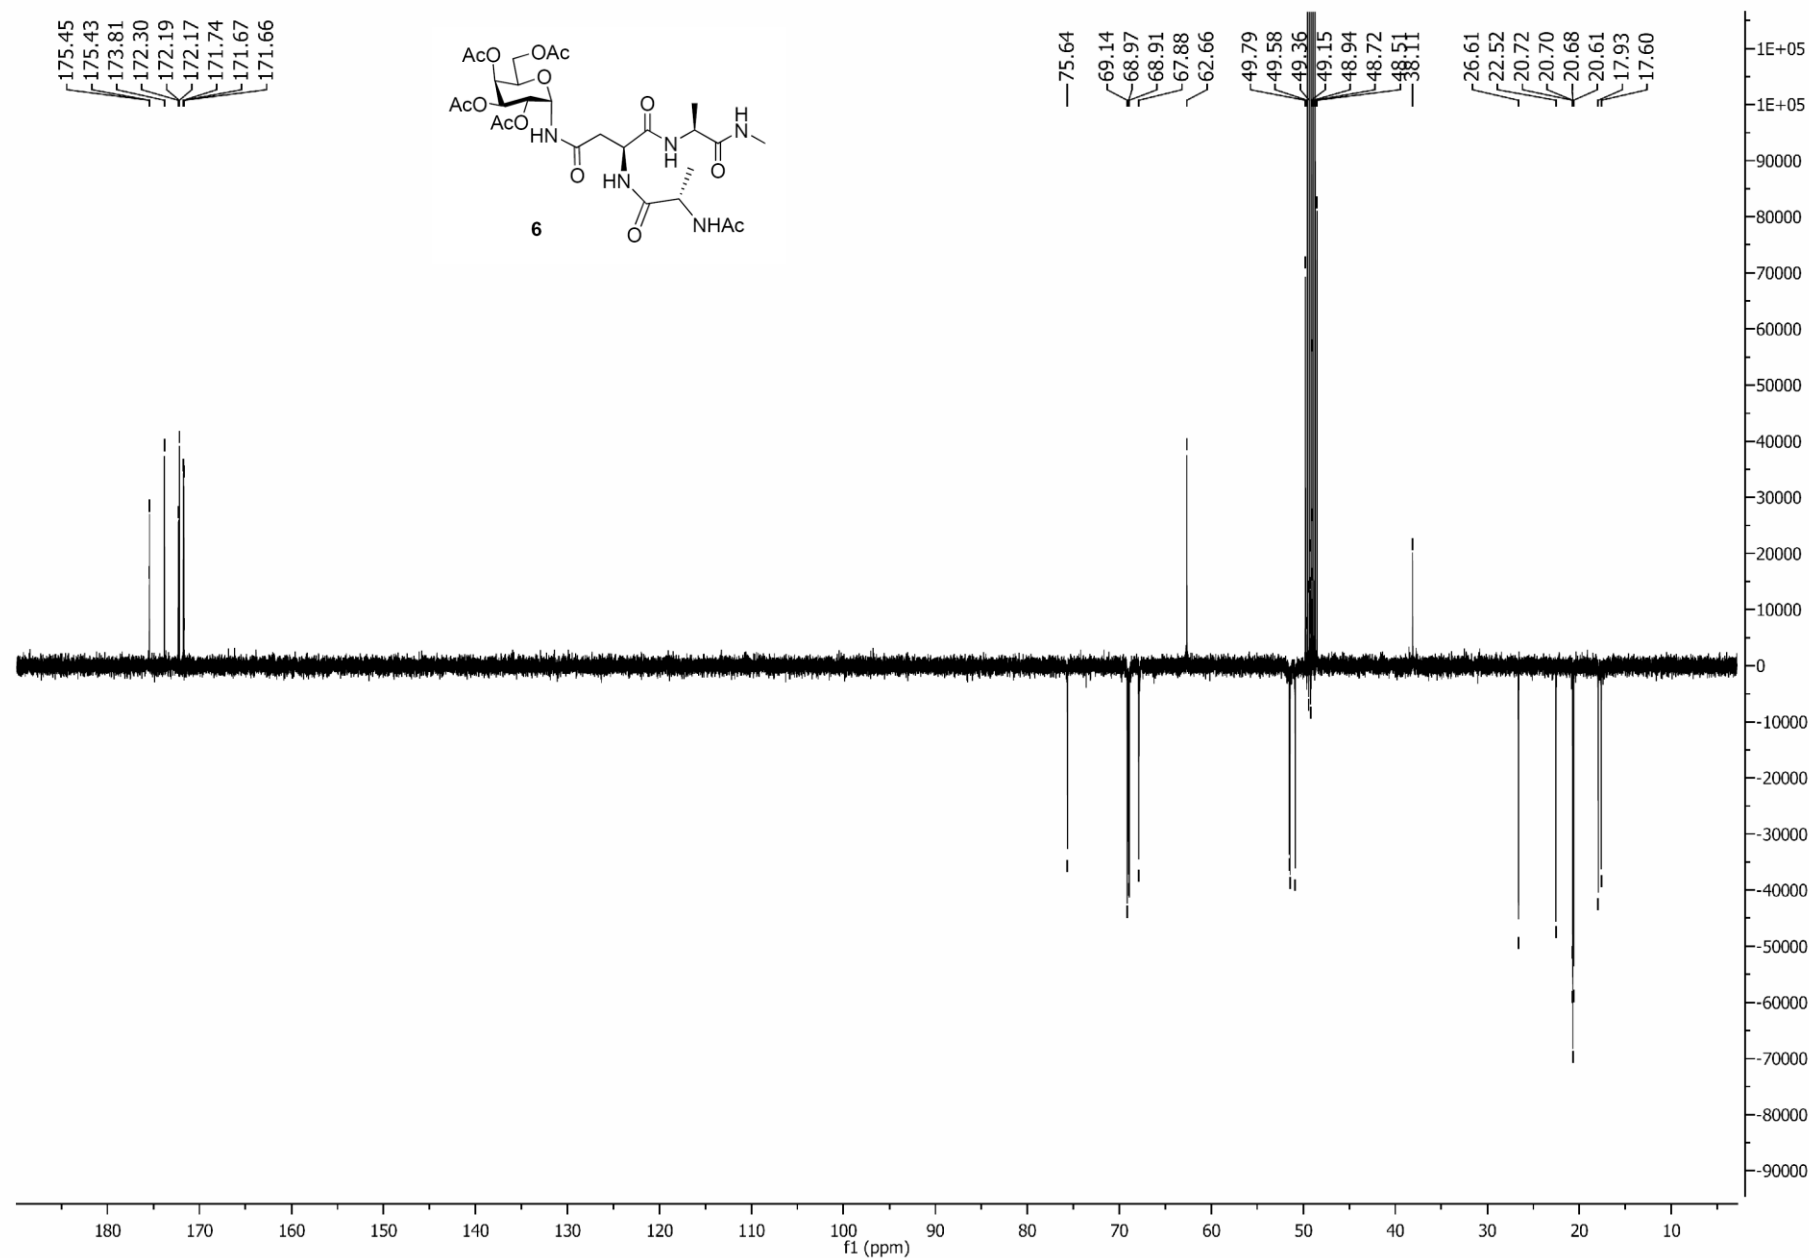



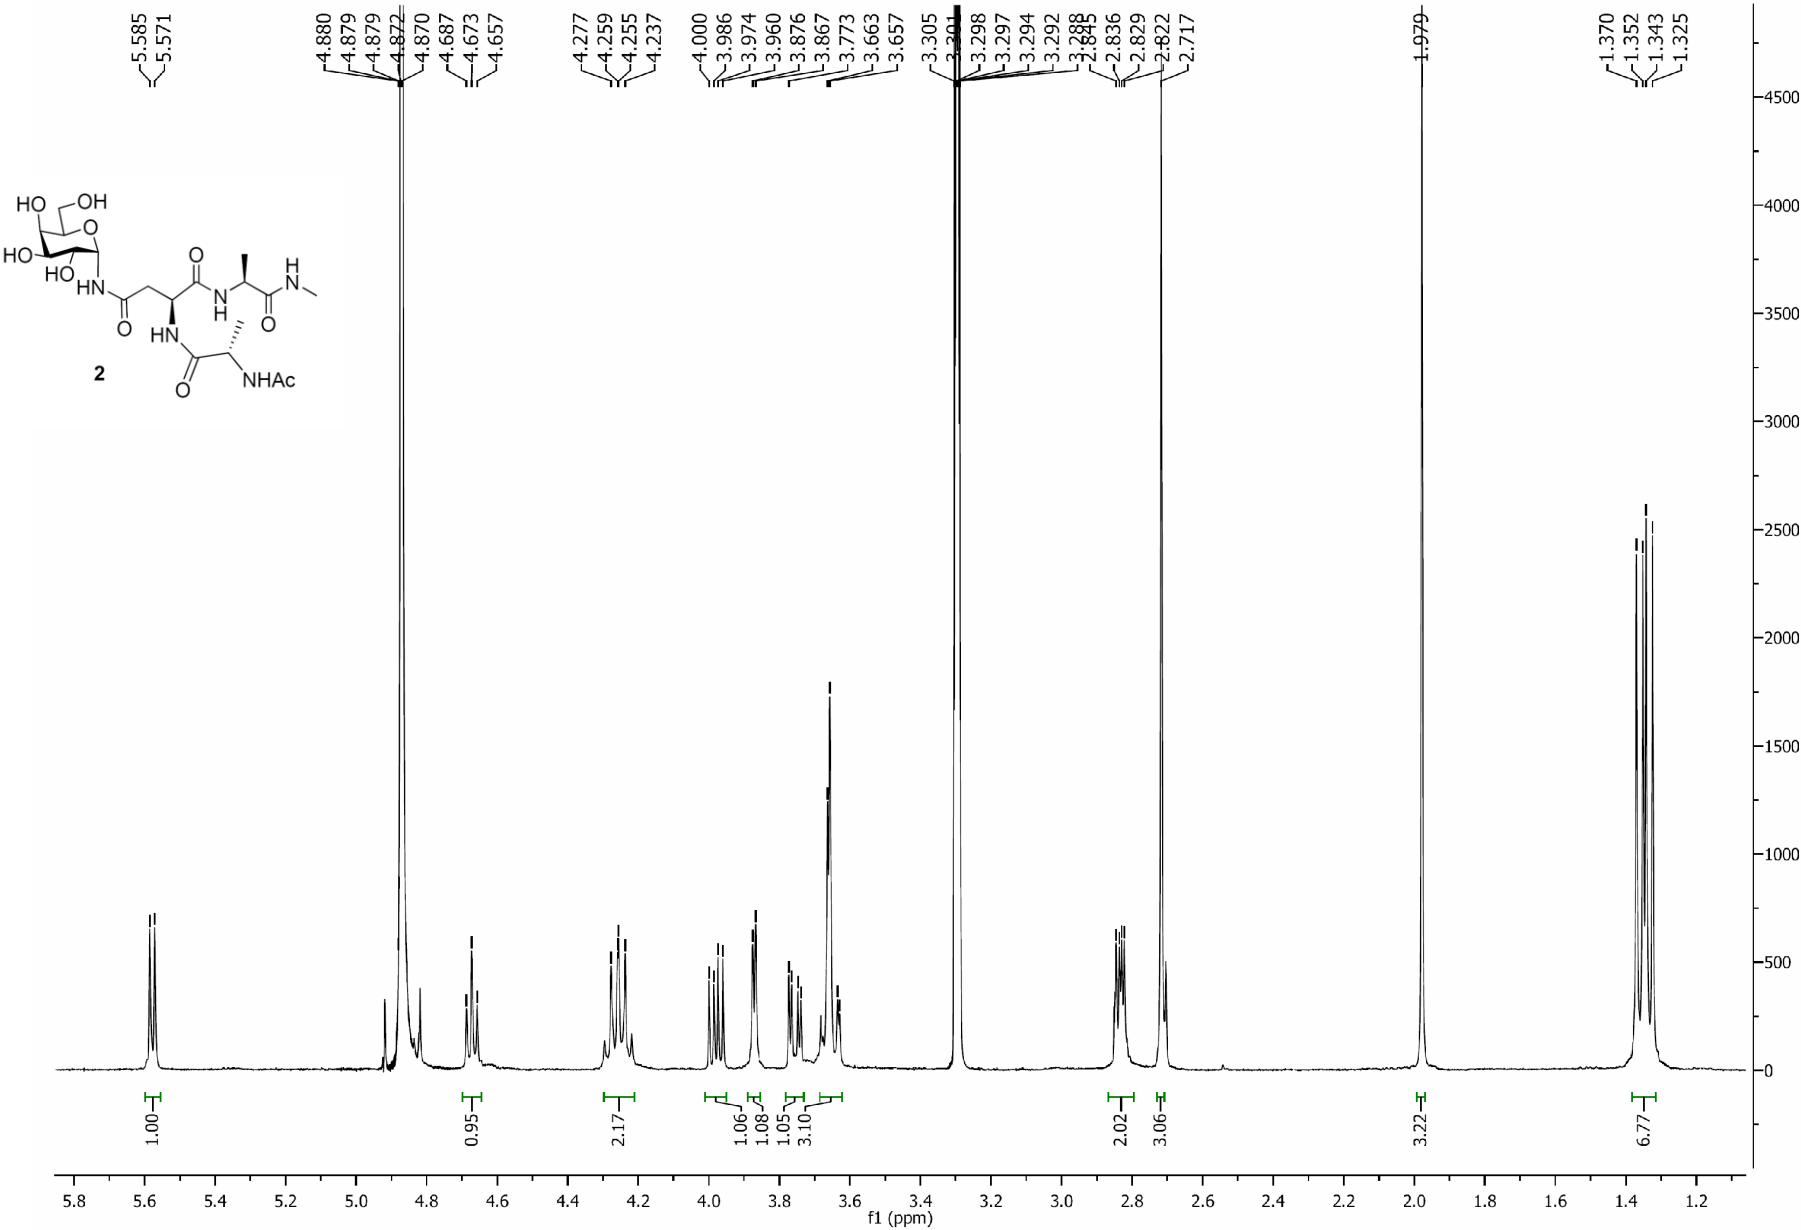

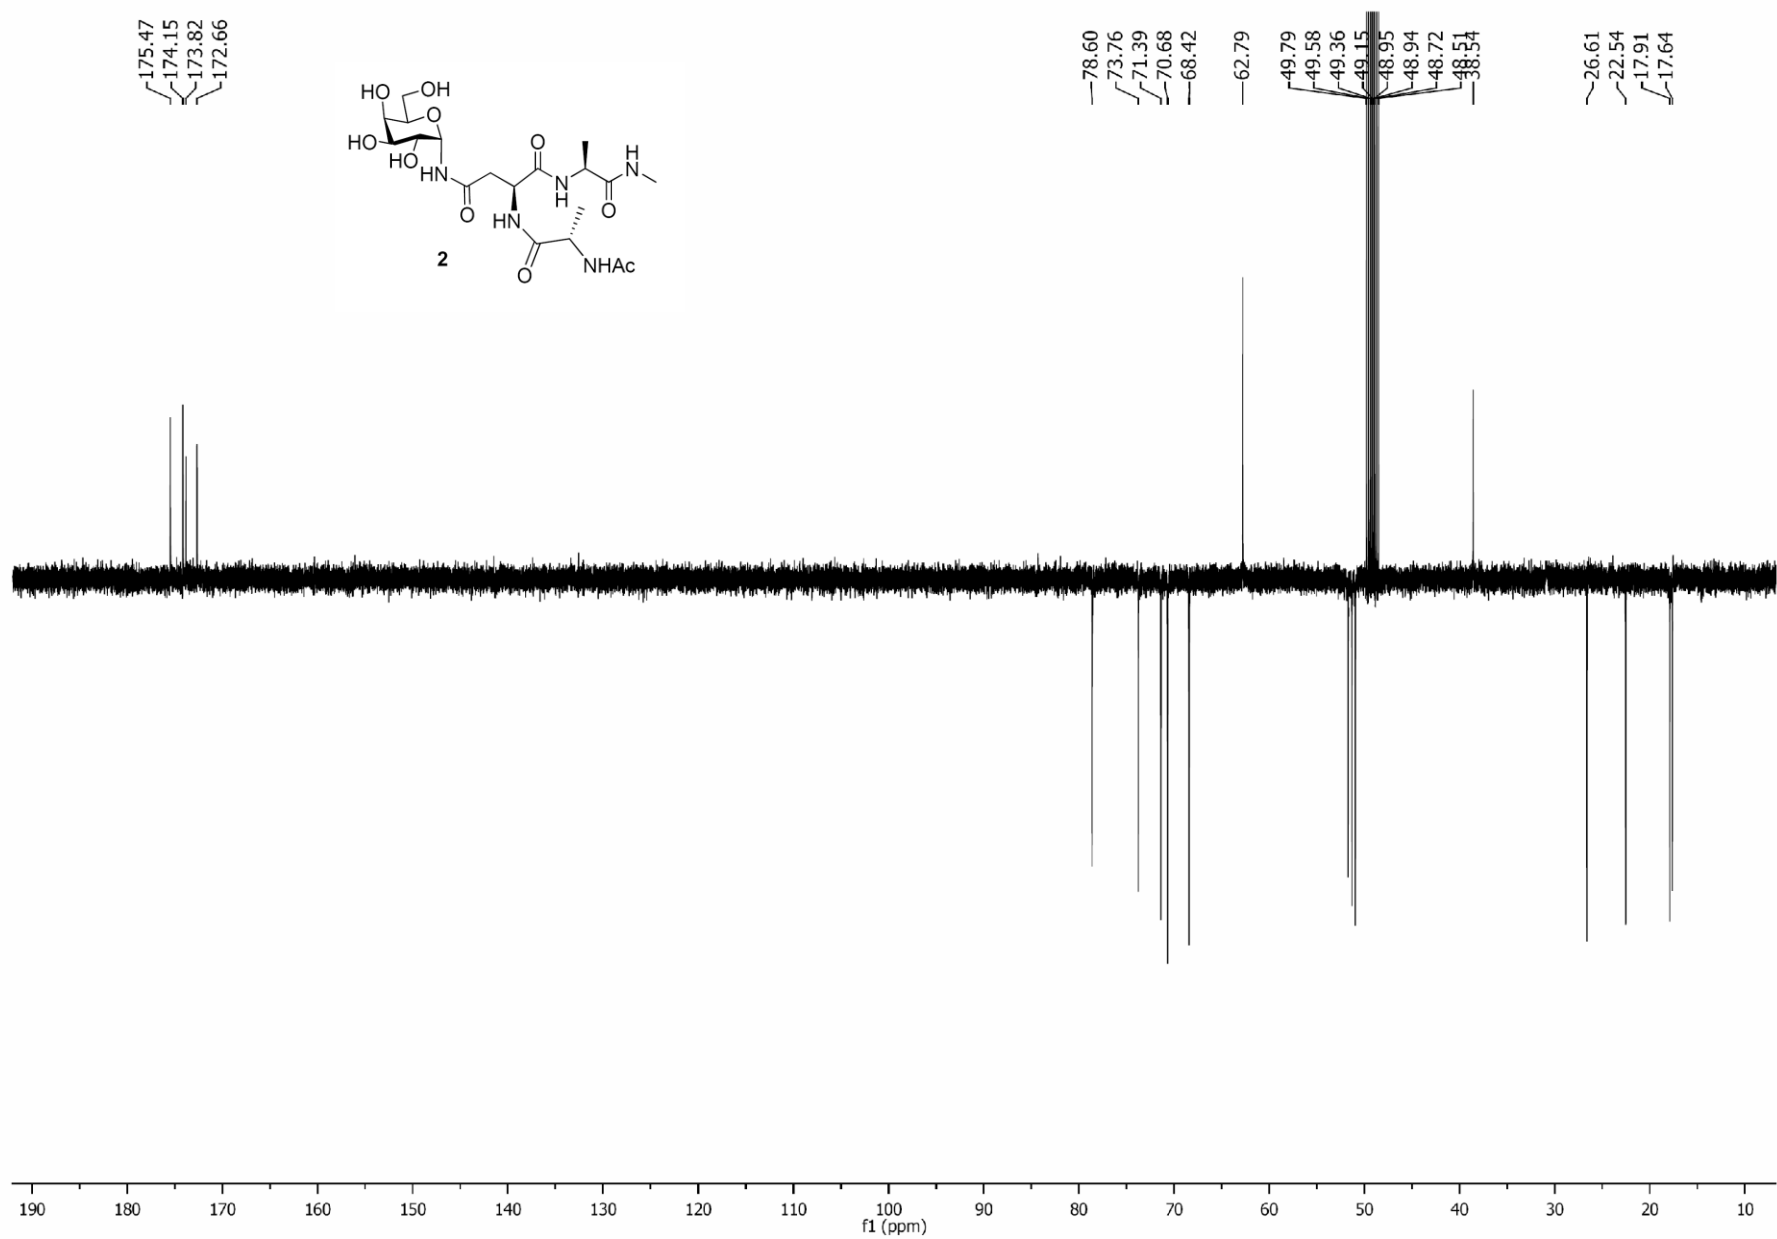

**$^1\text{H}$**   
**500 MHz T=278K**

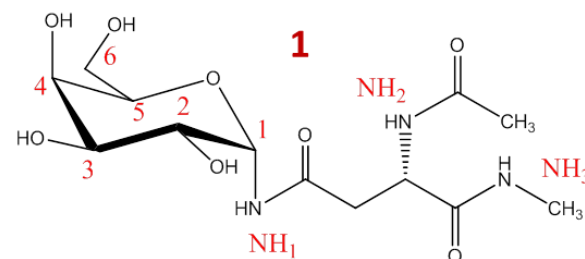

Ac-Asn-( $\alpha$ -N-Gal)-NHMe

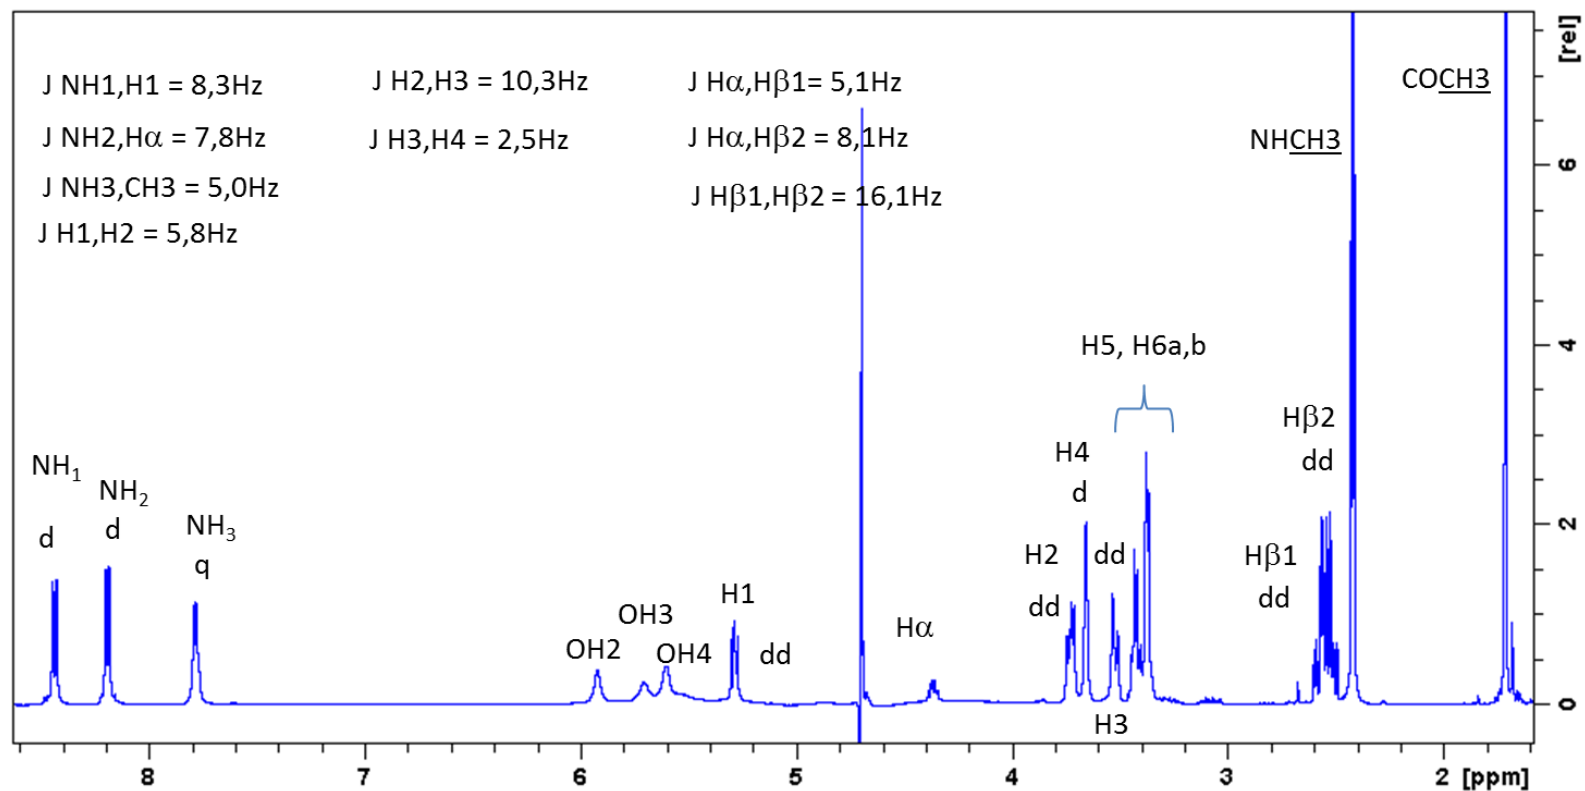

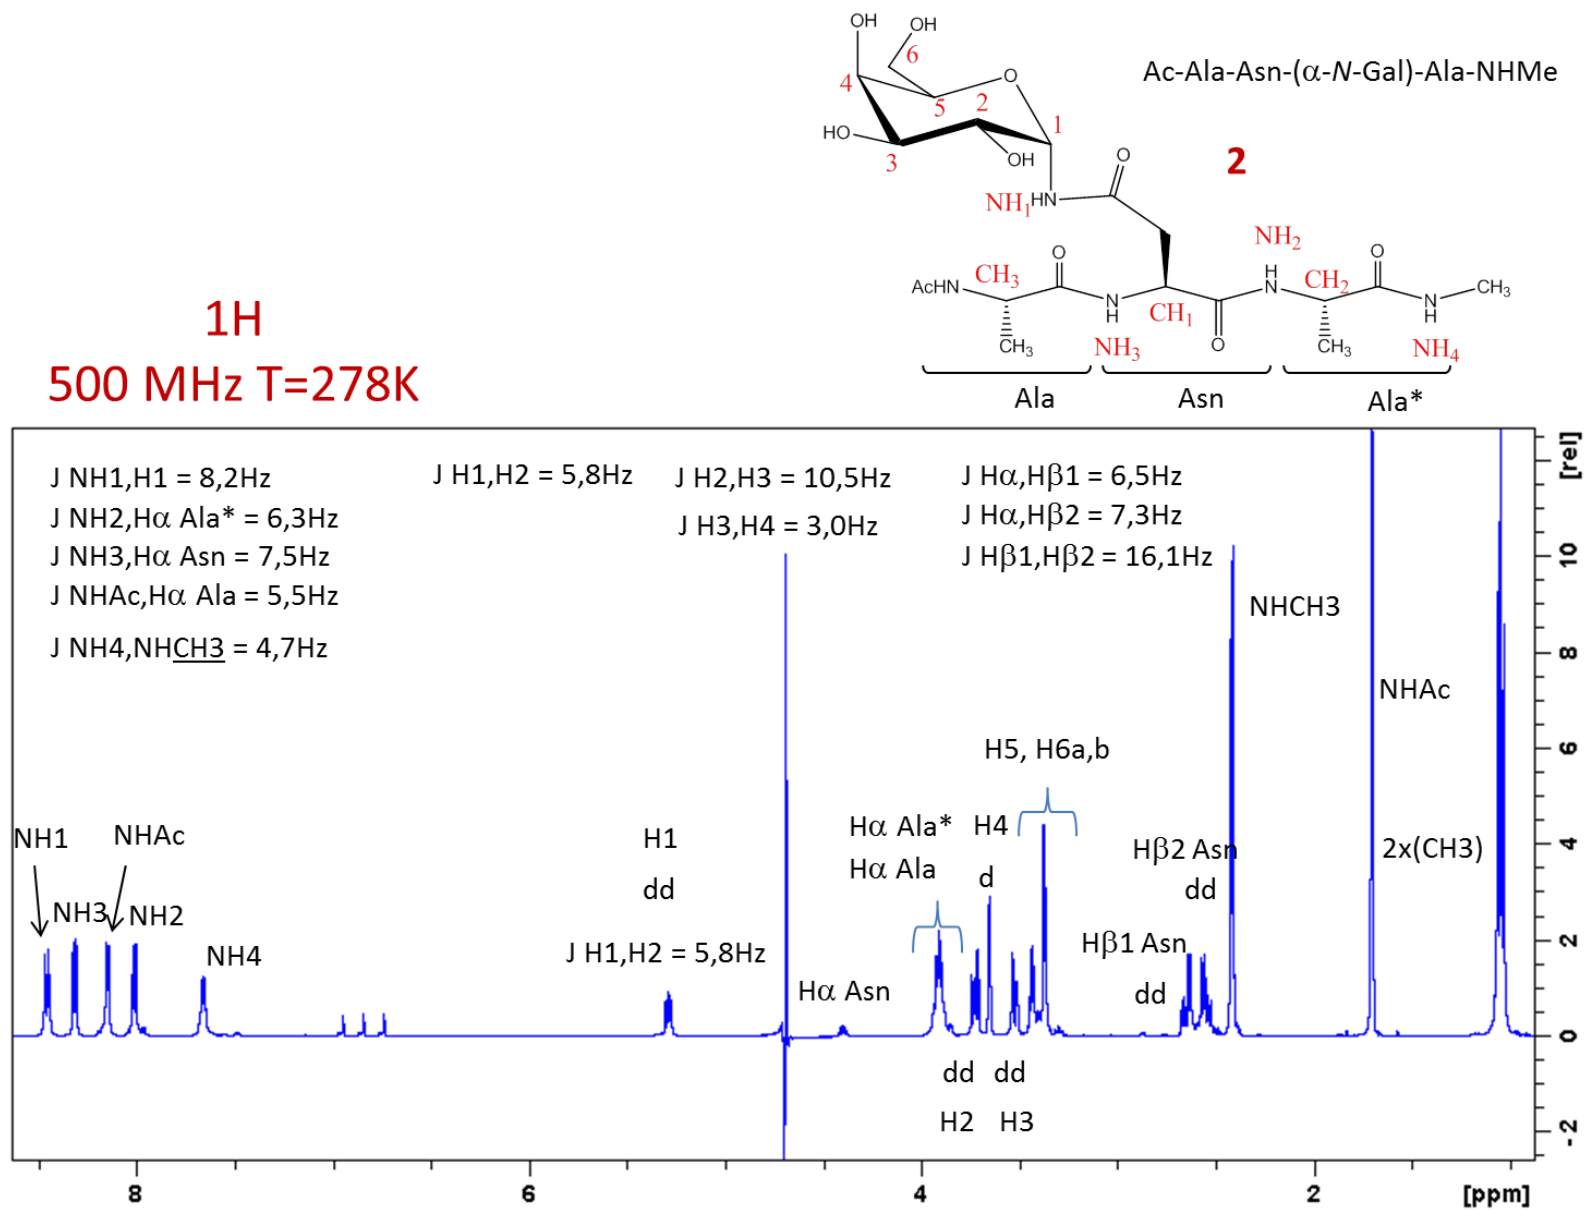

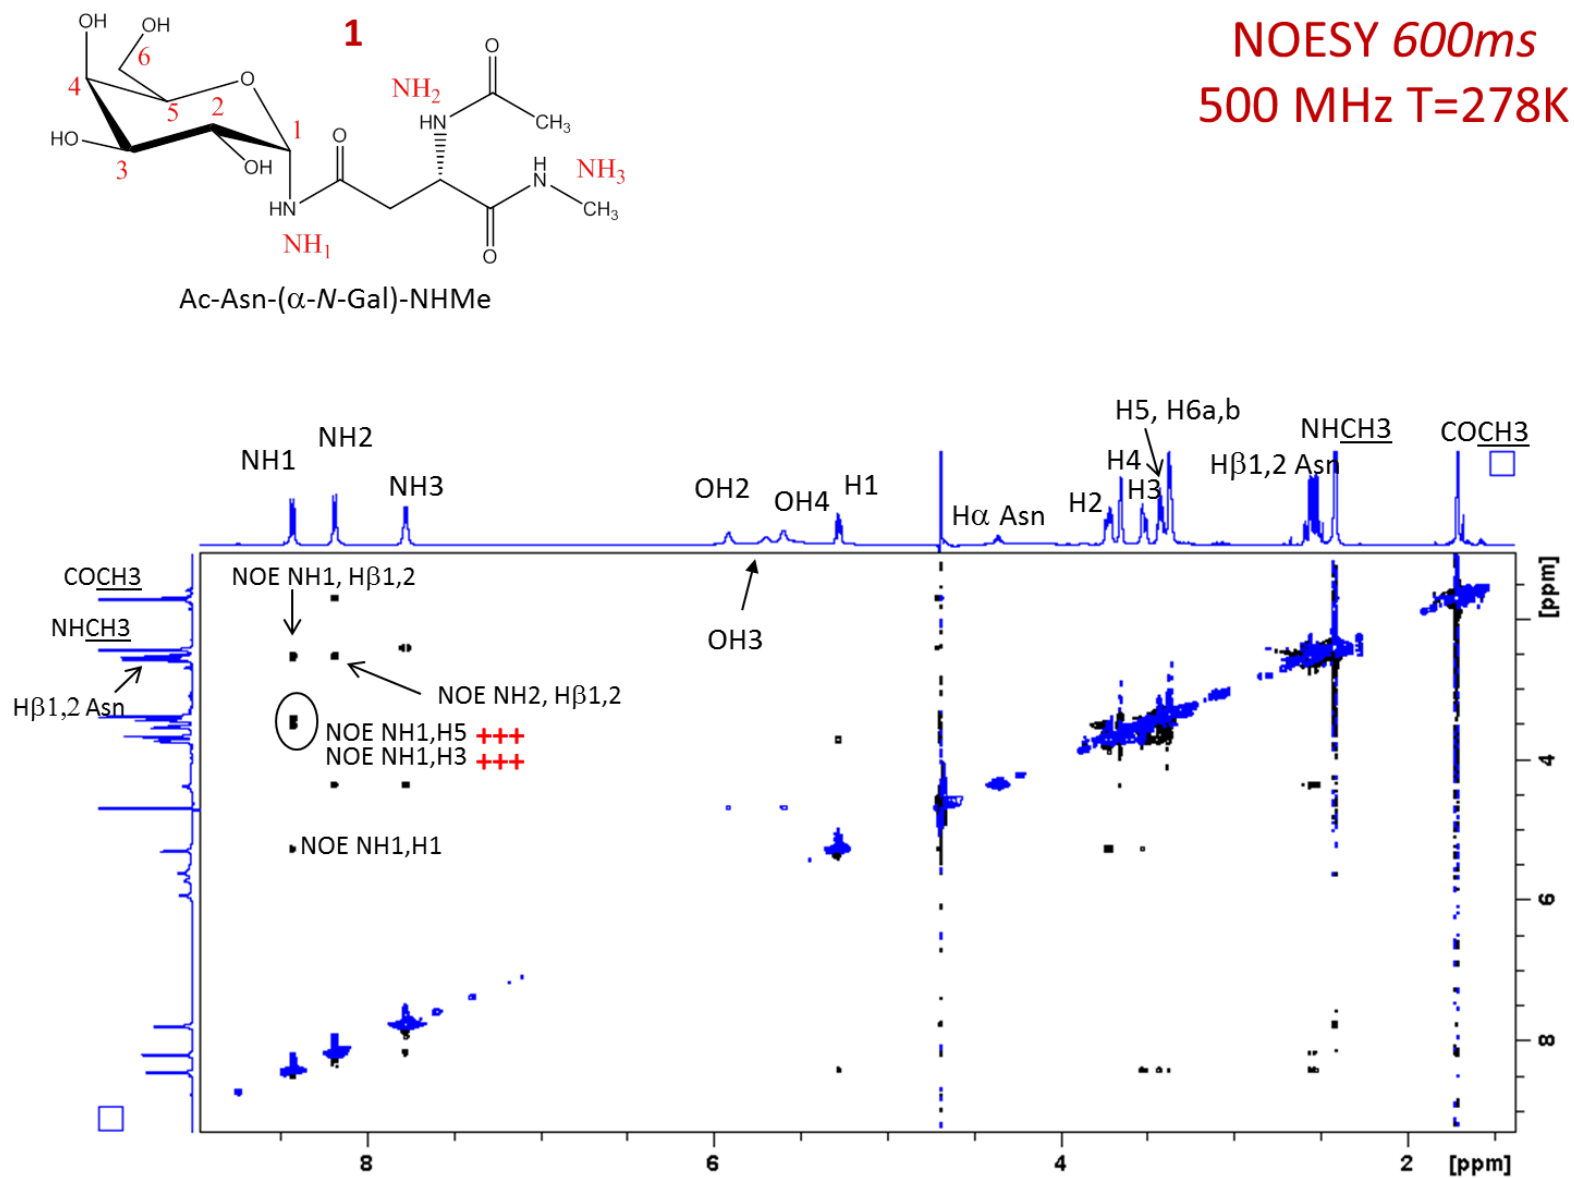

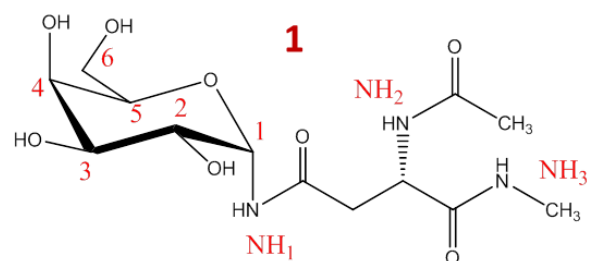

Ac-Asn-( $\alpha$ -N-Gal)-NHMe

NOESY 600ms  
600 MHz T=278K

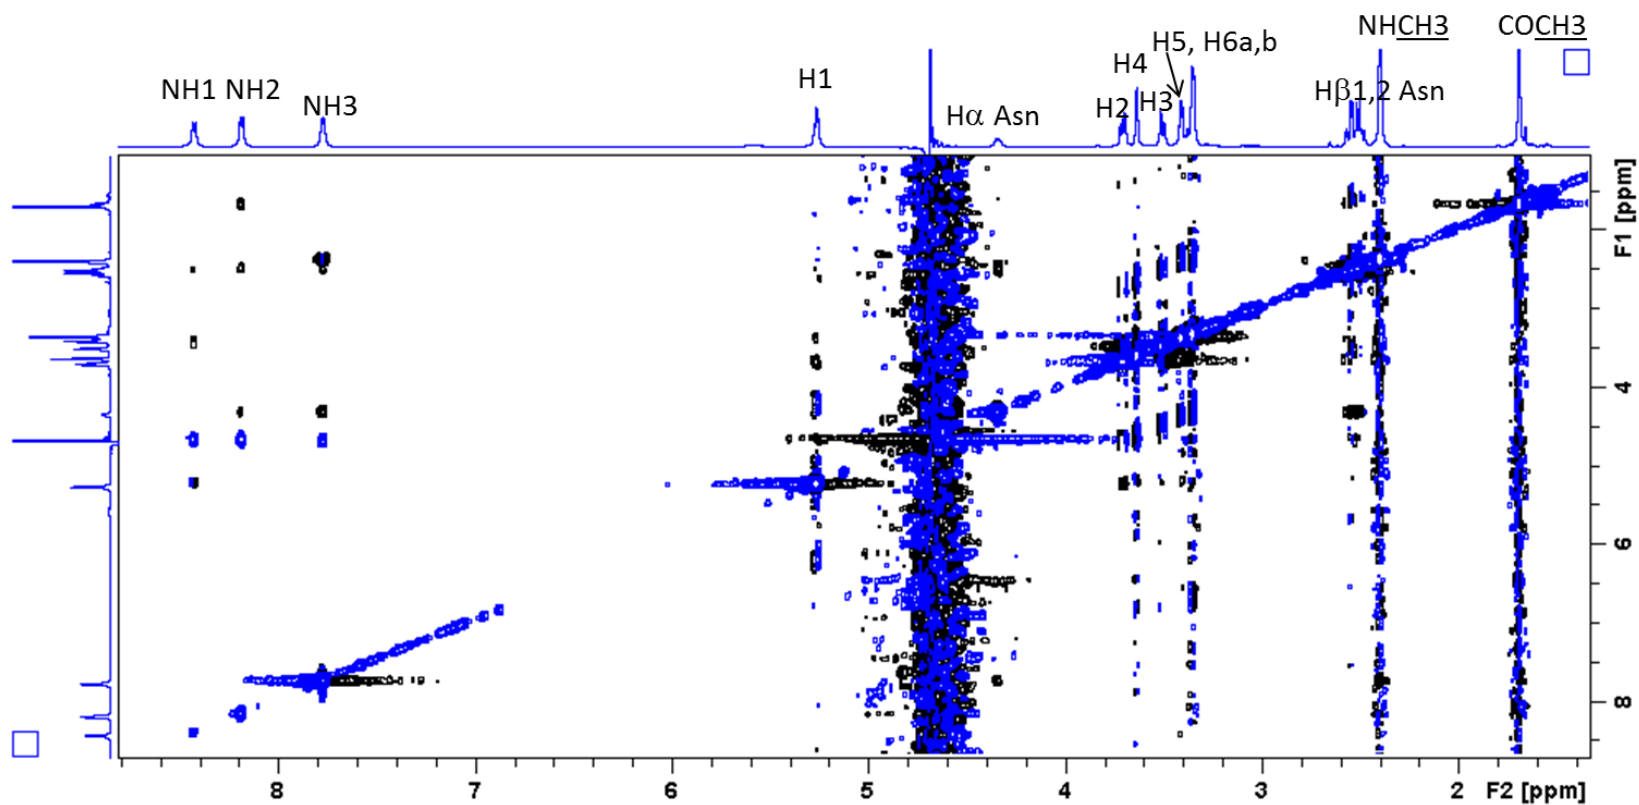

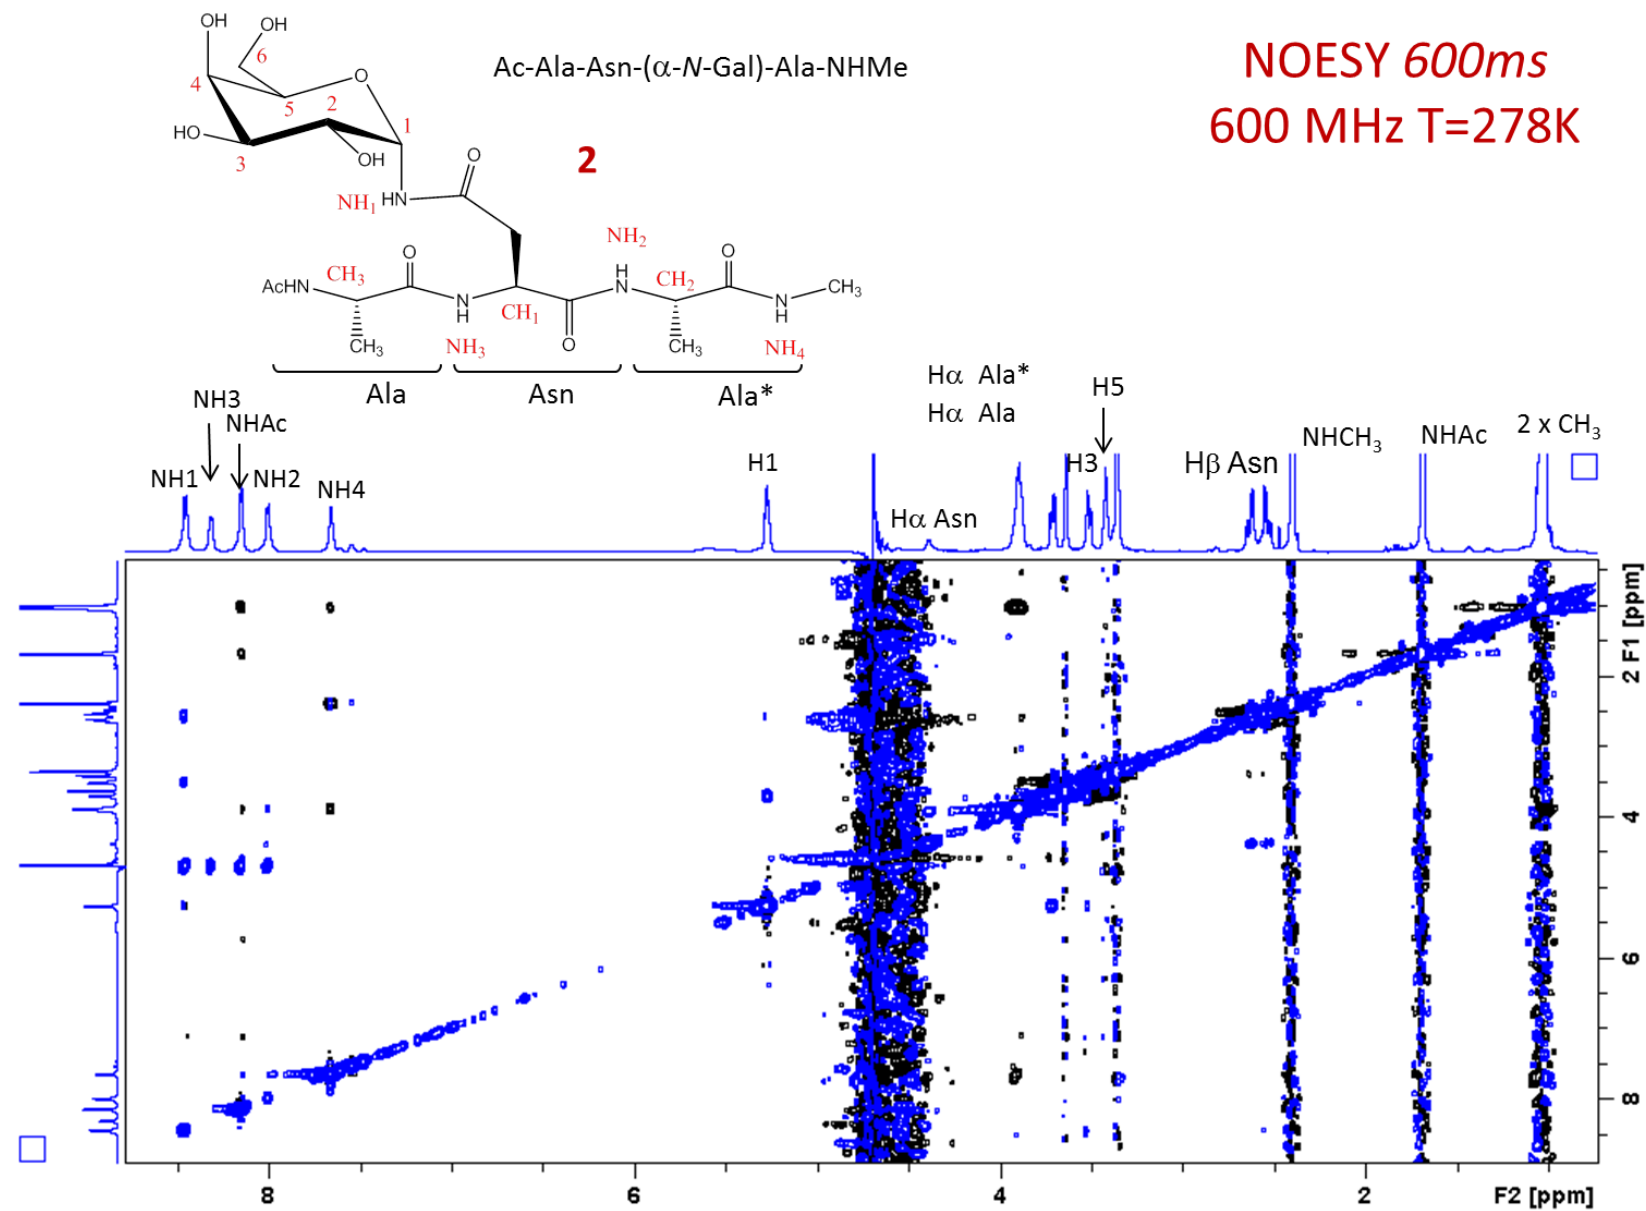

## *Viscum album* agglutinin (VAA)

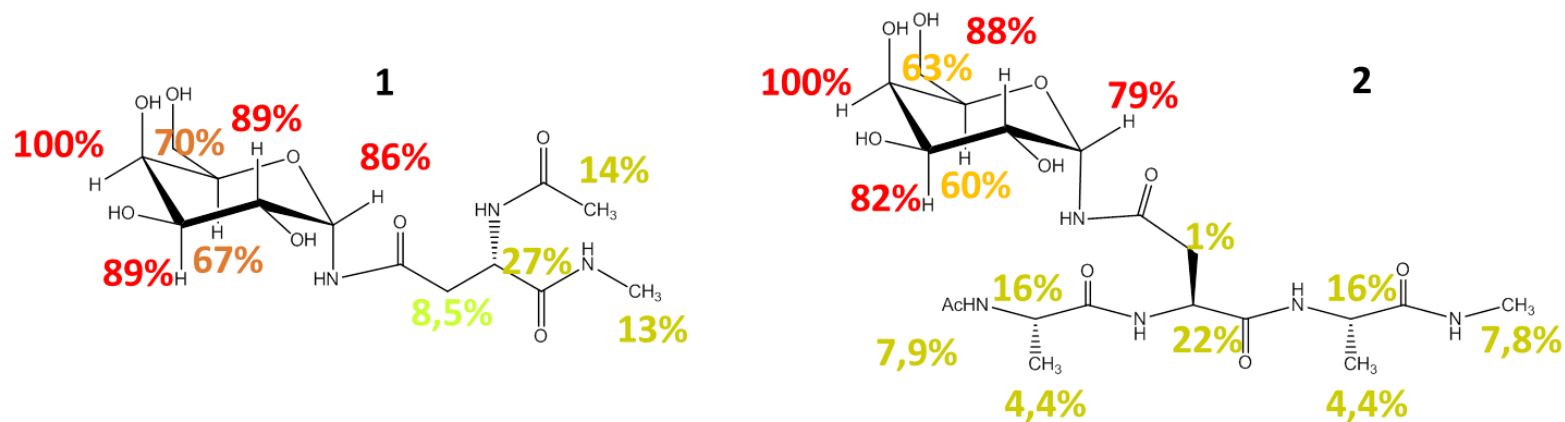

## *Erythrina cristagalli* lectin (ECA)

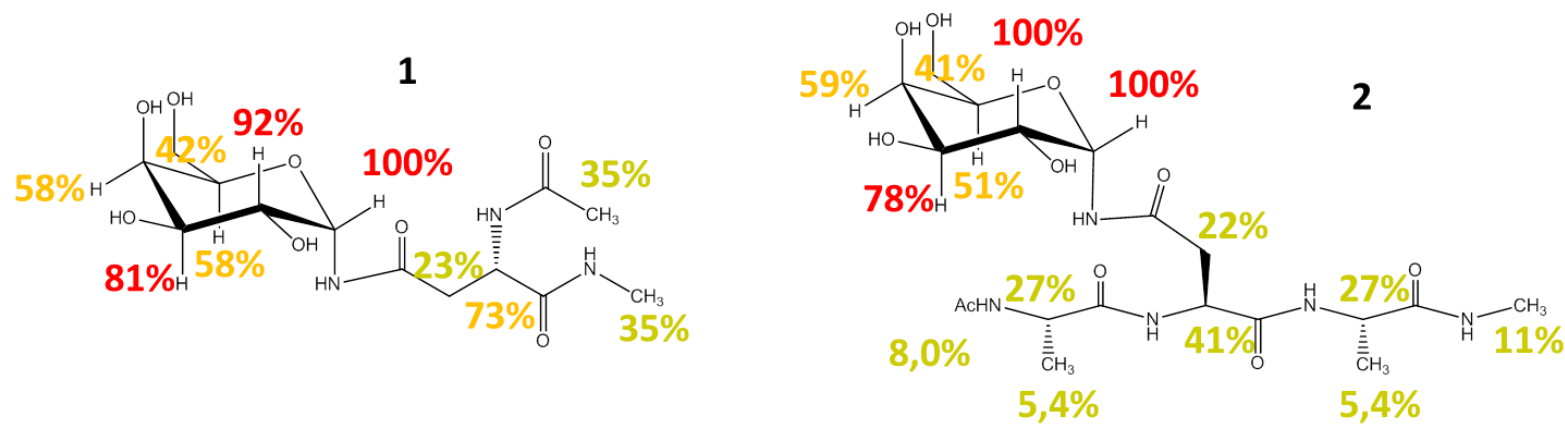



## STD COMPETITION BINDING EXPERIMENTS

### *Viscum album* agglutinin (VAA)

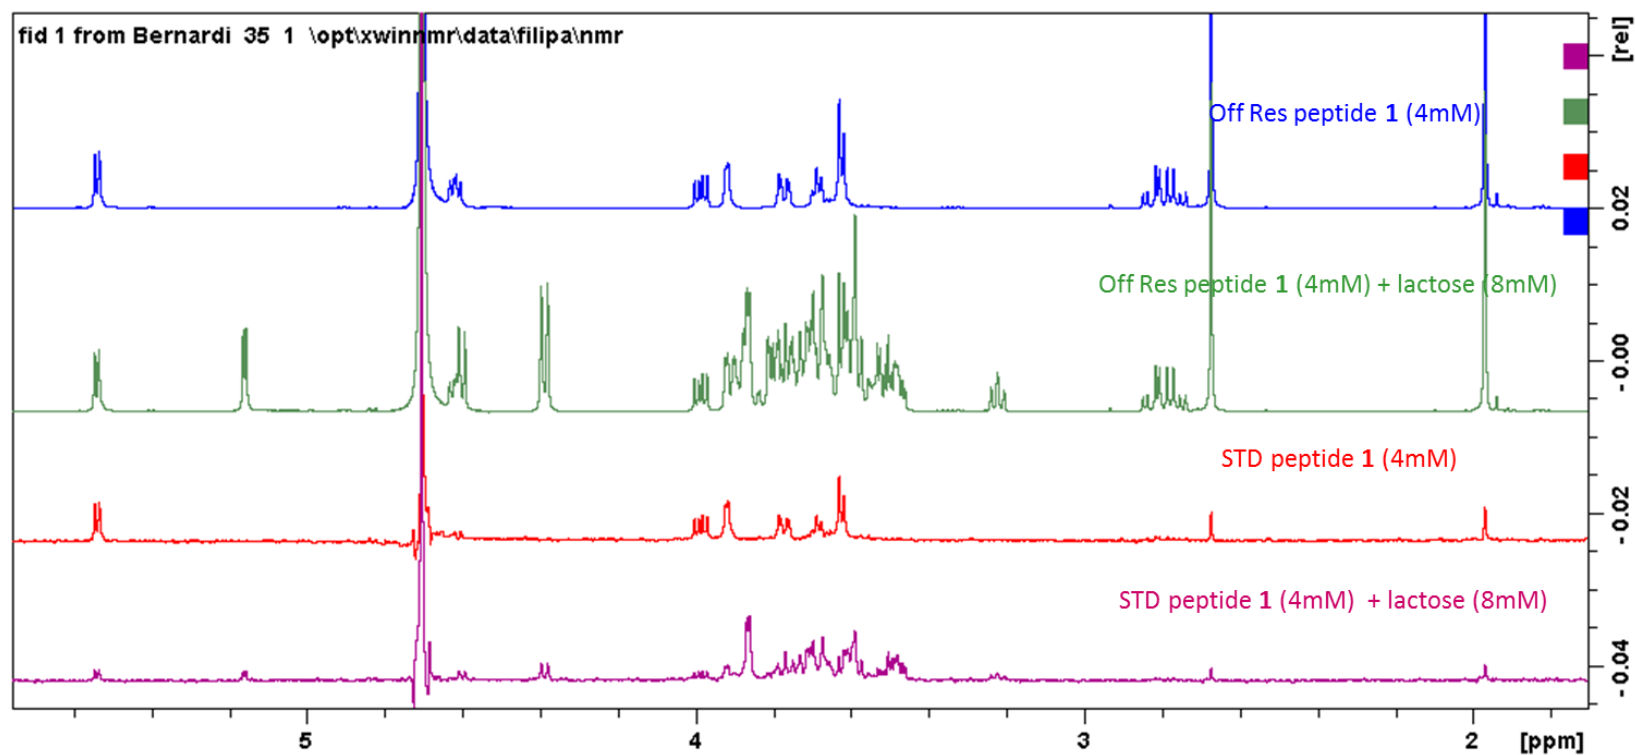

## STD COMPETITION BINDING EXPERIMENTS

### *Viscum album* agglutinin (VAA)

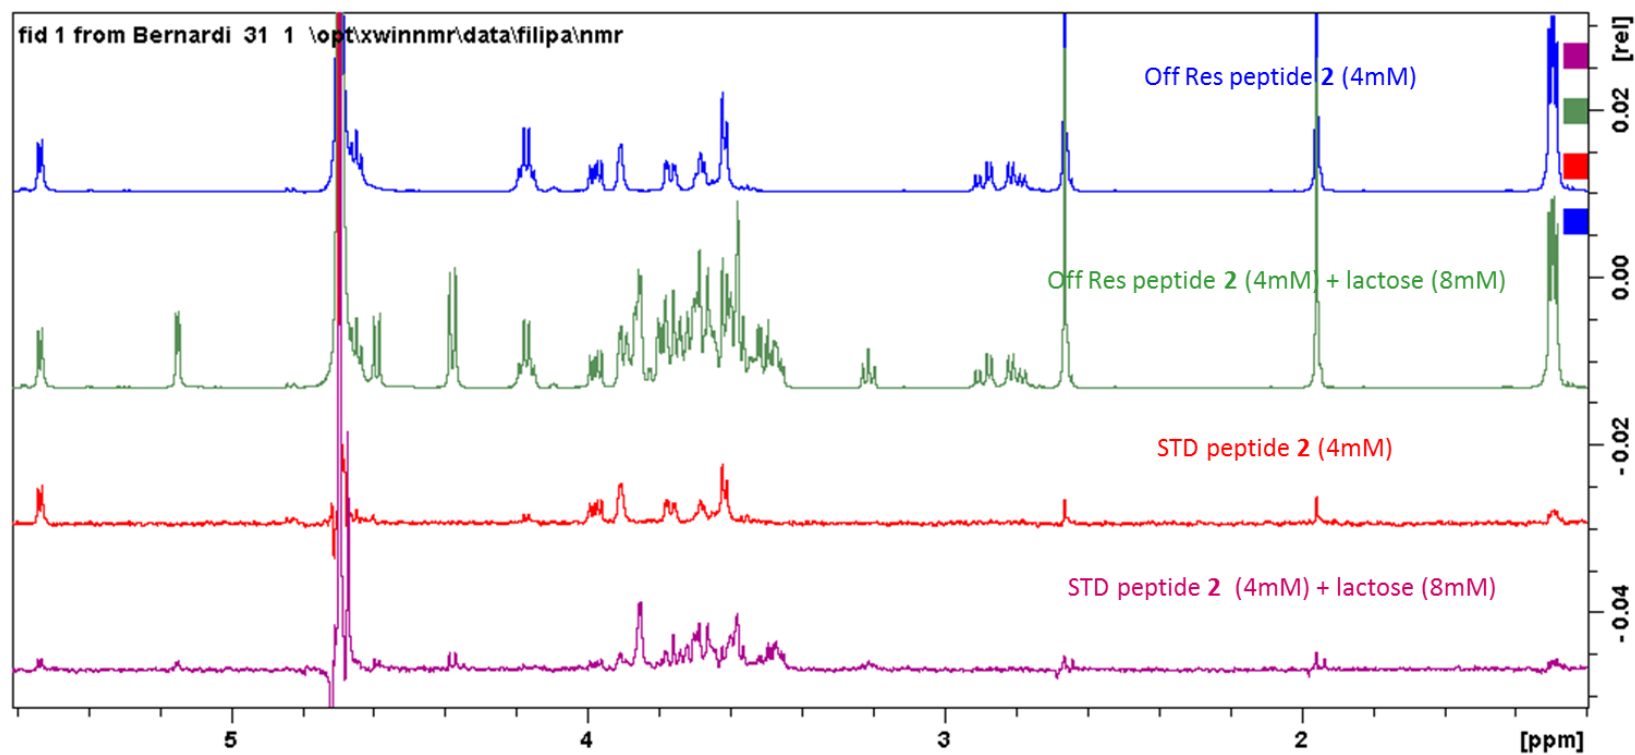

## STD COMPETITION BINDING EXPERIMENTS

### *Erythrina cristagalli* lectin (ECA)

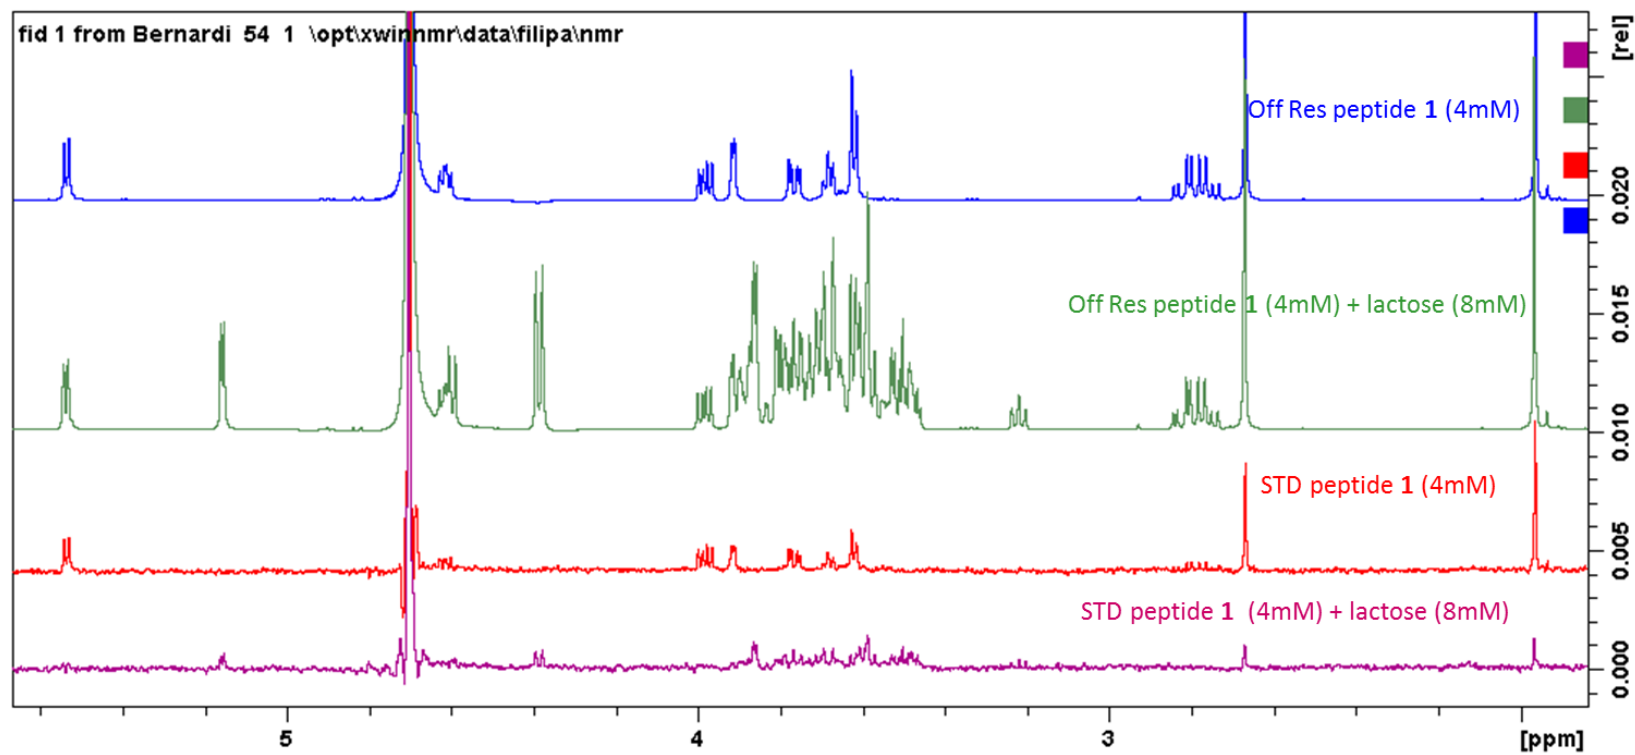

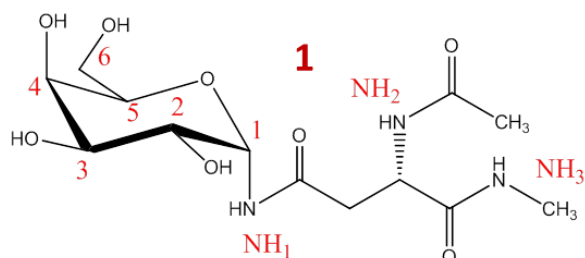

Ac-Asn-( $\alpha$ -N-Gal)-NHMe

TR-NOESY 200ms  
600 MHz T=278K

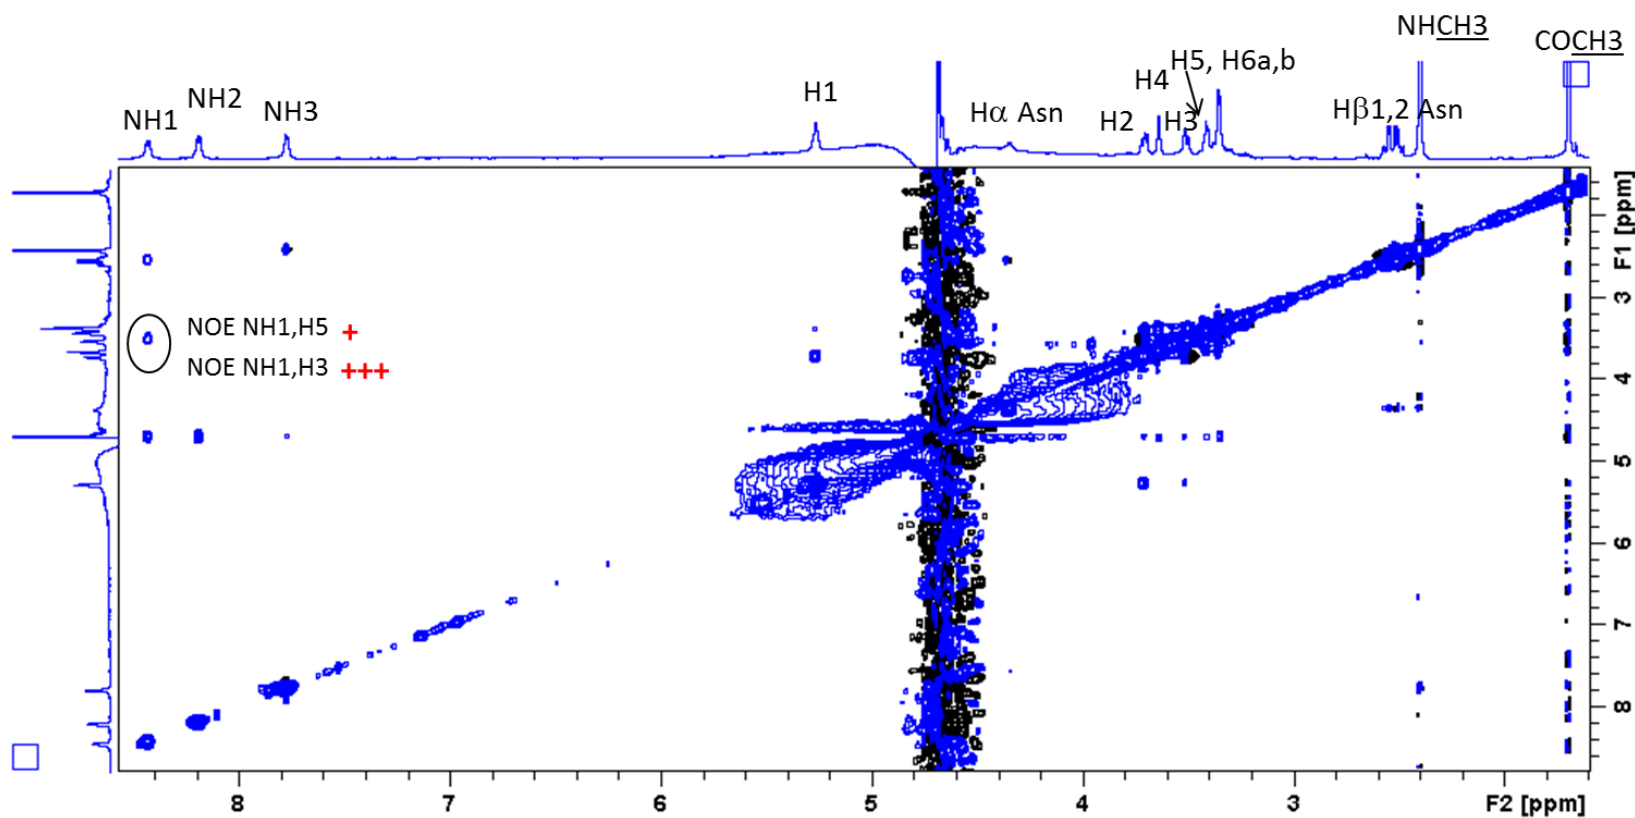

## DOCKING STUDIES

*Viscum album* agglutinin (VAA) and glycopeptide **1**

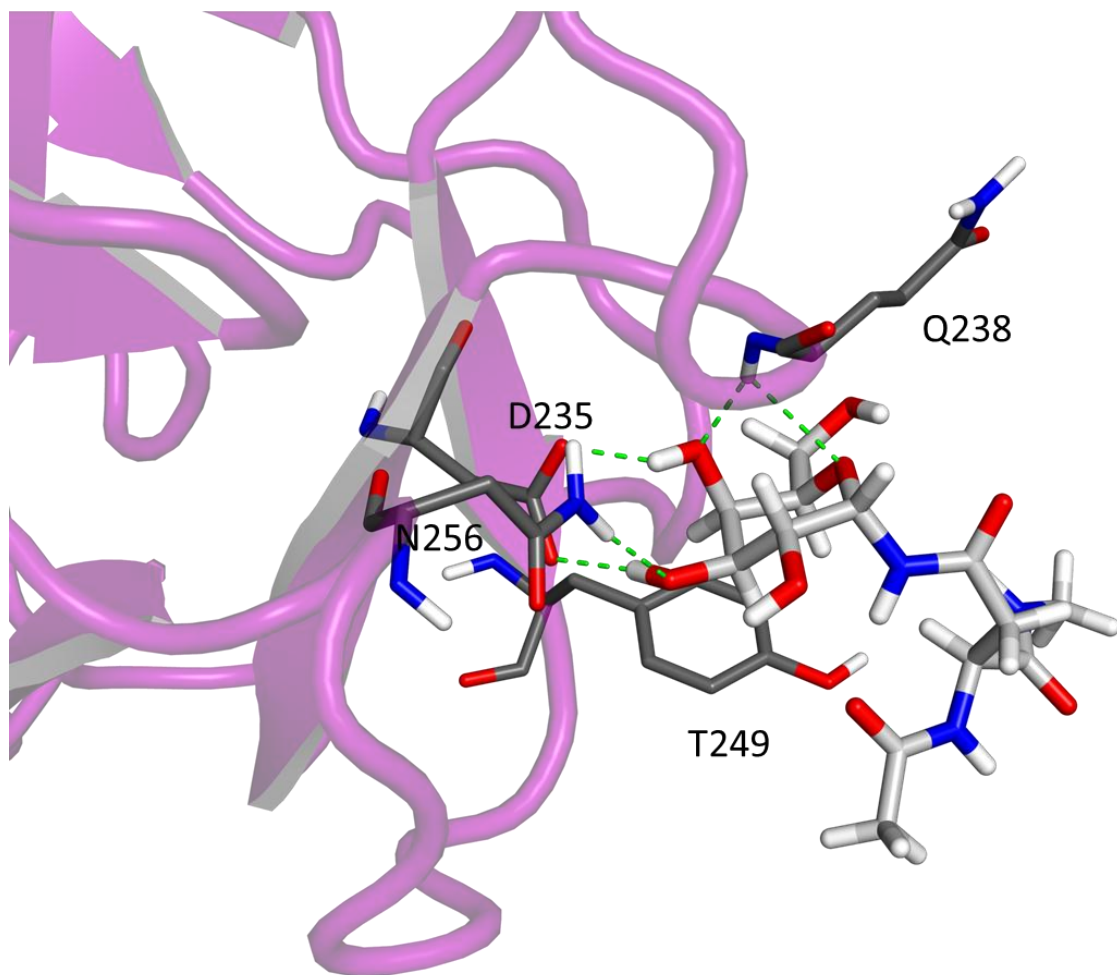

## DOCKING STUDIES

### *Erythrina cristagalli* lectin (ECA) and glycopeptide **1**

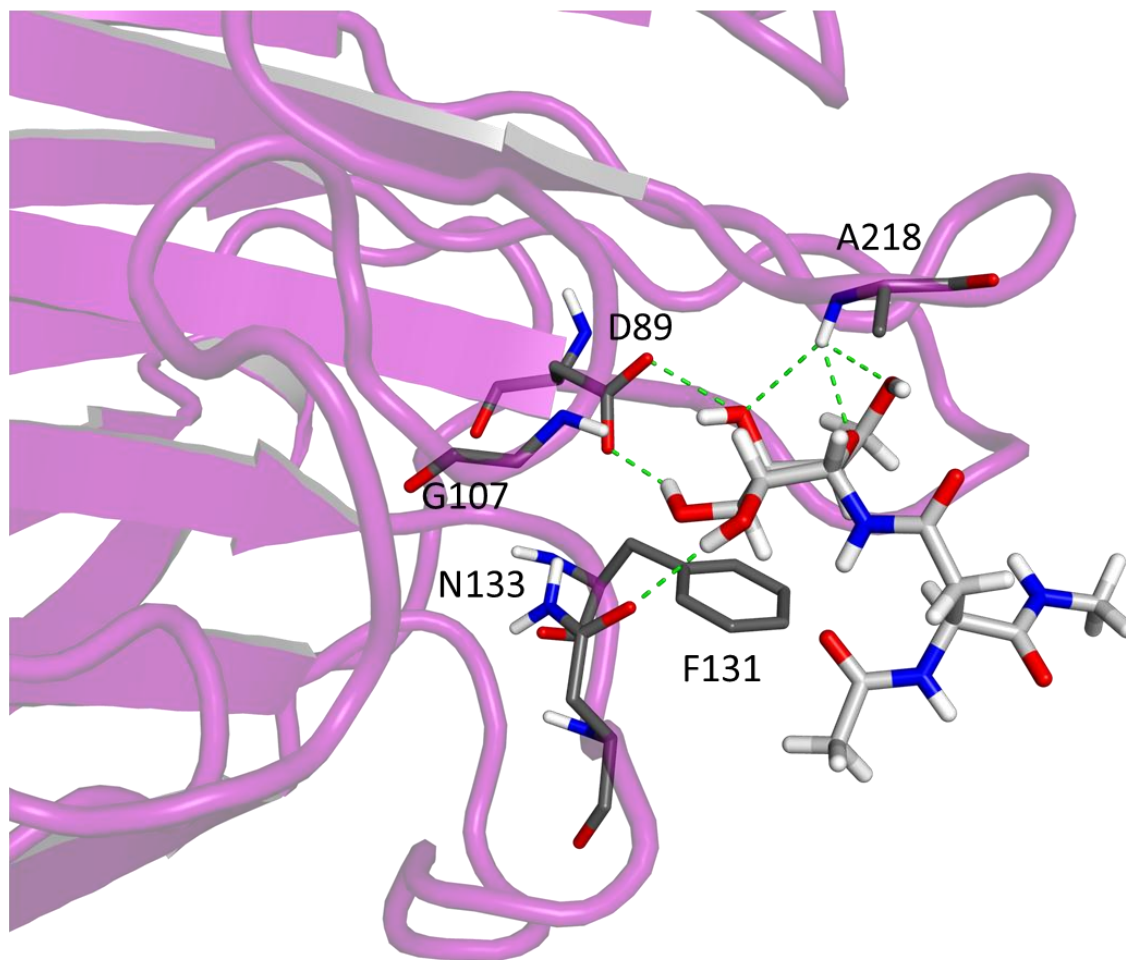

## DOCKING STUDIES

*Erythrina cristagalli* lectin (ECA) and glycopeptide 2

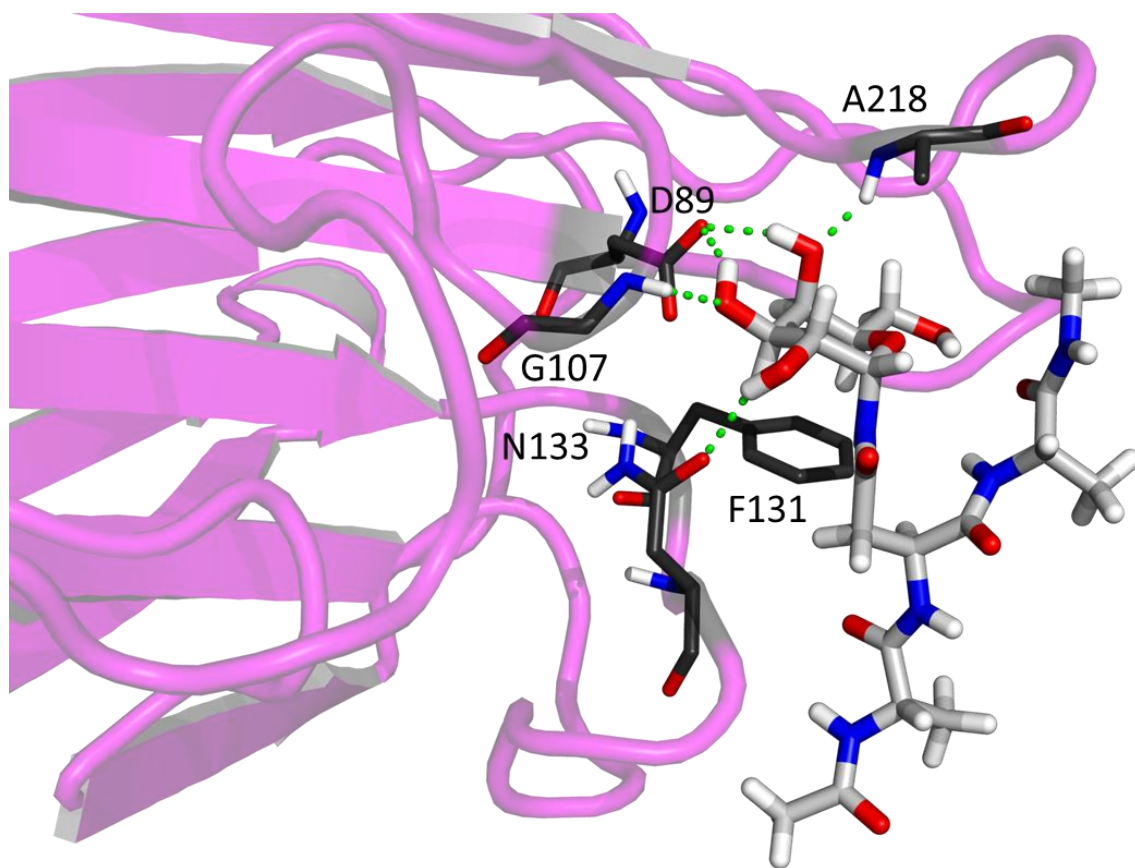

Supplement: c2ob07135e.pdf [file c2ob07135e.pdf]
